1 **Characterization of a glycolipid glycosyltransferase with broad substrate specificity**  
2 **from the marine bacterium *Candidatus Pelagibacter* sp. HTCC7211**

3

4 **Tao Wei<sup>a\*</sup>, Caimeng Zhao<sup>a</sup>, Mussa Quareshy<sup>b</sup>, Nan Wu<sup>a</sup>, Shen Huang<sup>a</sup>, Yuezhe Zhao<sup>a</sup>,**  
5 **Pengfei Yang<sup>a</sup>, Duobin Mao<sup>a</sup>, Yin Chen<sup>b\*</sup>**

6 **a** School of Food and Biological Engineering, Zhengzhou University of Light Industry,  
7 Zhengzhou, China

8 **b** School of Life Sciences, University of Warwick, Coventry, CV4 7AL United Kingdom

9

10

11 **Running title:** New glycolipid glycosyltransferase from SAR11

12

13 **#Address correspondence to: Dr Wei Tao** (School of Food and Biological Engineering,  
14 Zhengzhou University of Light Industry, Zhengzhou, 450002, China. Email,  
15 [weit8008@zzuli.edu.cn](mailto:weit8008@zzuli.edu.cn) or **Dr Yin Chen** (School of Life Sciences, University of Warwick,  
16 Coventry, CV4 7AL, United Kingdom. Email: [Y.chen.25@warwick.ac.uk](mailto:Y.chen.25@warwick.ac.uk)

17

18 **Keywords** Glycoglycerolipid, glycosyltransferase, GT<sub>cp</sub>, MGlc-DAG, lipid remodelling

19

20

21

22 Submission to *Environmental Microbiology*

23

24 **Abstract**

25 In the marine environment, phosphorus availability significantly affects the lipid composition in  
26 many cosmopolitan marine heterotrophic bacteria, including members of the SAR11 clade and  
27 the Roseobacter clade. Under phosphorus stress conditions, non-phosphorus sugar-  
28 containing glycoacylglycerolipids are substitutes for phospholipids in these bacteria. Although  
29 these glycoacylglycerolipids play an important role as surrogates for phospholipids under  
30 phosphate deprivation, glycoacylglycerolipid synthases in marine microbes are poorly studied. In  
31 the present study, we biochemically characterized a glycolipid glycosyltransferase (GT<sub>cp</sub>) from  
32 the marine bacterium *Candidatus Pelagibacter* sp. HTCC7211, a member of the SAR11 clade.  
33 Our results showed that GT<sub>cp</sub> is able to act as a multifunctional enzyme by synthesizing  
34 different glycoacylglycerolipids with UDP-glucose, UDP-galactose, or UDP-glucuronic acid as  
35 sugar donors and diacylglycerol as the acceptor. Analyses of enzyme kinetic parameters  
36 demonstrated that Mg<sup>2+</sup> notably changes the enzyme's affinity for UDP-glucose, which  
37 improves its catalytic efficiency. Homology modelling and mutational analyses revealed  
38 binding sites for the sugar donor and the diacylglycerol lipid acceptor, which provided insights  
39 into the retaining mechanism of GT<sub>cp</sub> with its GT-B fold. A phylogenetic analysis showed that  
40 GT<sub>cp</sub> and its homologs form a group in the GT4 glycosyltransferase family. These results not  
41 only provide new insights into the glycoacylglycerolipid synthesis mechanism in lipid remodelling,  
42 but also describe an efficient enzymatic tool for future synthesis of bioactive molecules.

43

44 **Importance**

45 The bilayer formed by membrane lipids serves as the containment unit for living microbial  
46 cells. In the marine environment, it has been firmly established that phytoplankton and  
47 heterotrophic bacteria can substitute phospholipids with non-phosphorus sugar-containing  
48 glycolipids in response to phosphorus limitation. However, little is known about how  
49 these glycolipids are synthesized. Here, we determined the biochemical characteristics  
50 of a glycolipid glycosyltransferase (GT<sub>cp</sub>) from the marine bacterium *Candidatus Pelagibacter*  
51 sp. HTCC7211. GT<sub>cp</sub> and its homologs form a group in the GT4 glycosyltransferase family,  
52 and can synthesize neutral glycolipids (MGlc-DAG and MGal-DAG) and an acidic glycolipid  
53 (MGlcA-DAG). We also uncover the key residues for DAG-binding through molecular docking,  
54 site-direct mutagenesis and subsequent enzyme activity assays. Our data provide new  
55 insights into the glycolipid synthesis mechanism in lipid remodelling.

## 56 Introduction

57 Phospholipids form the structural basis of all cells, but sugar-containing glyco-  
58 glycerolipids are mainly restricted to marine microbes, cyanobacteria, and higher plants (1, 2).  
59 Glyco-  
60 glycerolipids are found on the lipid bilayer of cell membranes and play critical roles in  
61 cell growth, cellular recognition, adhesion, neuronal repair, and signal transduction. These  
62 natural glyco-  
63 glycerolipids often have unusual and sometimes unexpected biological activities,  
64 such as antitumor, antiviral, anti-inflammatory, antimalarial, immunostimulatory, and  
65 neuritogenic activities, which make them valuable molecular targets for research (3-5). The  
66 basic structure of glyco-  
67 glycerolipids is characterized by a 1, 2-diacyl-*sn*-glycerol (DAG) moiety  
68 with different numbers and types of sugars (glucose, galactose, mannose, rhamnose, or  
69 charged sugars like glucuronic acid or sulfoquinovose) attached at the *sn*-3 position of the  
70 glycerol backbone in DAG. These sugar attachments have an  $\alpha$ - or  $\beta$ -anomeric configuration,  
71 and are bound via (1 $\rightarrow$ 2), (1 $\rightarrow$ 3), (1 $\rightarrow$ 4), or (1 $\rightarrow$ 6) linkages (6, 7). The common  
72 glyco-  
73 glycerolipid structures in marine heterotrophic microbes and cyanobacteria are 1,2-  
74 diacyl-3-O-( $\beta$ -D-galactopyranosyl)-*sn*-glycerol (monogalactosyl diacylglycerol, MGal-DAG),  
75 1,2-diacyl-3-O-( $\alpha$ -D-glucopyranosyl)-*sn*-glycerol (monoglucosyl DAG, MGlc-DAG), 1,2-diacyl-  
76 3-O-( $\alpha$ -D-galactopyranosyl)-(1 $\rightarrow$ 6)-O- $\beta$ -D-galactopyranosyl)-*sn*-glycerol (digalactosyl DAG,  
77 DGal-DAG), and 1,2-diacyl-3-O-(6-deoxy-6-sulfo- $\alpha$ -D-galactopyranosyl)-*sn*-glycerol  
78 (sulfoquinovosyl DAG, SQDG) (2,8).

79 Glyco-  
80 glycerolipids are usually synthesized by glycosyltransferases (GTs), which are  
81 highly divergent and polyphyletic. The GTs can be categorized into 110 numbered families  
82 according to their sequence similarity and signature motifs, and the stereochemistry of the  
83 glycoside linkage formed (9). Of the 110 families, the families GT4, GT21, and GT28, which  
84 are known as glyco-  
85 glycerolipid synthases, utilize sugar nucleotides as donors and contain a  
86 consensus sugar donor binding domain near the C-terminus (10, 11). Despite the wide variety  
87 of bacterial glyco-  
88 glycerolipids, only a few bacterial lipid GTs have been identified and  
89 characterized so far. The GTs synthesizing MGlc-DAG and DGal-DAG have been isolated  
90 from the cell wall-less bacterium *Acholeplasma laidlawii*, and were found to belong to the GT4

84 family in the carbohydrate-active enzymes (CAZy) database (12). Other known members of  
85 bacterial GT4 include the MGlc-DAG synthases from *Deinococcus radiodurans* and  
86 *Thermotoga maritima* and the MGal-DAG synthase from *Borrelia burgdorferi*, which was the  
87 first cloned galactosyltransferase forming MGal-DAG with the  $\alpha$ -anomeric configuration of the  
88 sugar (13, 14). A bifunctional GT (designated as Agt) from *Agrobacterium tumefaciens* was  
89 found to synthesize MGlc-DAG or MGlcA-DAG with UDP-glucose (UDP-Glc) or UDP-  
90 glucuronic acid (UDP-GlcA) as the sugar donor, respectively (7). This enzyme also belongs to  
91 the GT4 family and was the first glucuronosyl DAG synthase to be isolated. The processive  
92 GTs (Pgts), however, are members of the GT21 family, and show high sequence similarity to  
93 GT4 family GTs. The Pgts include enzymes from *Mesorhizobium loti* and *A. tumefaciens* that  
94 synthesize DGal-DAG, glucosylgalactosyl-DAG (GlcGal-DAG), and triglycosyl DAGs (15, 16).  
95 To the best of our knowledge, the structure function relationship of DAG-dependent GT4  
96 glycosyltransferases has not been studied previously due to the lack of crystal structure of  
97 these glycolipids-producing enzymes and, as such, the binding pockets for UDP-  
98 sugars and DAG remain elusive.

99 Glycolipids play important roles in marine phytoplankton and heterotrophic  
100 bacteria under phosphate deprivation. Lipid remodelling reduces the cellular requirement for  
101 phosphorus, and the glycolipids MGlc-DAG/MGlcA-DAG and SQDG replace  
102 phospholipids in marine heterotrophic bacteria and marine phytoplankton and cyanobacteria,  
103 respectively (17-20). However, little is known about how these glycolipids are  
104 synthesized. Previous studies have shown that a manganese-dependent  
105 metallophosphoesterase, PlcP, is essential for lipid remodelling in marine heterotrophs, and  
106 that the *plcP* gene is organized in an operon-like structure and a putative glycosyltransferase  
107 was found down stream of *plcP* in numerous marine heterotrophic bacteria, such as members  
108 of the SAR11 clade (18, 21). Our previous work has shown that the GT from the marine  
109 bacterium SAR11 (*Candidatus Pelagibacter* sp. HTCC7211 and HTCC1062) is homologous  
110 to the Agt GT in *A. tumefaciens* (18). However, the activity of a SAR11 GT in the synthesis of  
111 glycolipids has not been characterized so far.

112 In this study, we report the detailed biochemical characterization of a glycolycerolipid GT  
113 (GT<sub>cp</sub>) from the marine bacterium *Candidatus Pelagibacter* sp. HTCC7211. Our results  
114 showed that GT<sub>cp</sub> has a broad substrate specificity and can synthesize neutral glycolipids  
115 (MGlc-DAG and MGal-DAG) and an acidic glycolipid (MGlcA-DAG). GT<sub>cp</sub> represents the first  
116 member of the GT4 family of lipid GTs from marine bacteria. In addition, homology modelling  
117 and site-directed mutagenesis analyses revealed details of its substrate recognition  
118 mechanism and identified key residues involved in the co-ordination of DAG in a GT4 family  
119 glycosyltransferase for lipid biosynthesis.

120

121

## 122 **Results and discussion**

### 123 **GT<sub>cp</sub> and its homologs form a new group in the GT4 family with a GT-B fold structure**

124 The gene encoding a putative GT<sub>cp</sub> (WP\_008545403.1) consists of 1005 bp encoding a  
125 peptide of 334 amino acids, containing a GT4-like domain (Fig. 1A). This gene was previously  
126 hypothesized to be involved in lipid remodelling in *Candidatus Pelagibacter* sp. HTCC7211 for  
127 the synthesis of MGlc-DAG and MGlcA-DAG (17, 18). Sequence alignment (Fig. 1B) analyses  
128 showed that the GT<sub>cp</sub> amino acid sequence has between 46-58% sequence identity with the  
129 putative GT from *Labrenzia aggregata* (GT<sub>la</sub>, WP\_040439323.1), *Thalassospira lucentensis*  
130 (GT<sub>tl</sub>, WP\_062950653.1), *Methylophaga nitratireducenticrescens* (GT<sub>mn</sub>, WP\_014706011.1),  
131 *Desulfobulbus mediterraneus* (GT<sub>dm</sub>, WP\_028584068.1), *Citromicrobium bathyomarimum*  
132 JL354 (GT<sub>cb</sub>, WP\_010239457.1), *Kordiimonas gwangyangensis* (GT<sub>kg</sub>, WP\_051078133.1),  
133 and the characterized Agt (locus tag, atu2297) from *A. tumefaciens* (7). In the phylogenetic  
134 analysis, the GT<sub>cp</sub>, together with its close homologs (GT<sub>la</sub>, GT<sub>tl</sub>, GT<sub>mn</sub>, GT<sub>dm</sub>, GT<sub>cb</sub>, GT<sub>kg</sub> and  
135 Agt), formed a clade in the GT4 family (Fig. 1A). Sequences from this clade showed low  
136 sequence identity (< 25%) to other members of GT4 family, which includes more than 150,000  
137 proteins with at least 22 different enzymatic activities at the time of writing. Purified Agt from  
138 *A. tumefaciens* has been found to synthesize MGlc-DAG or MGlcA-DAG with UDP-glucose or  
139 UDP-glucuronic acid as the sugar donor, respectively, and the expression of *agt* is known to

140 be induced under phosphate deficiency (18). Neither GT<sub>cp</sub> nor any of its homologs from marine  
141 bacteria have been purified nor characterized to date.

142 Due to the lack of a three-dimensional structure of DAG-dependent GT4  
143 glycosyltransferases to date, a model of GT<sub>cp</sub> was generated by homology modelling using  
144 the X-ray structure of the GT MshA co-crystallized with UDP (Protein Data Bank [PDB] entry  
145 3C4Q; 17% sequence identity) from *Corynebacterium glutamicum* as the template (Fig. 1C)  
146 (22). MshA, also a member of the GT4 family, catalyses the first step of the biosynthesis of  
147 mycothiol in actinobacteria using UDP-*N*-acetylglucosamine (UDP-GlcNAc) as the sugar  
148 donor (22). Using the PDBeFold server, we compared the crystal structure of MshA with the  
149 modelled structure of GT<sub>cp</sub>. The predicted structure of GT<sub>cp</sub> includes a GT-B fold consisting of  
150 two Rossmann-like  $\beta$ - $\alpha$ - $\beta$  domains, with the N-terminal domain (residues 1–160 and residues  
151 320–332) and C-terminal domain (residues 169–315), separated by a large cleft that includes  
152 the catalytic centre. The same GT-B fold is also found in several members of the GT4 family  
153 enzymes, including MshA and PimA (Fig. 1A) (22, 23). The substrate binding site of the sugar-  
154 donor is located mainly in the C-terminal domain, where the sugar-donor forms a number of  
155 hydrogen bonds with the protein. Given that the two enzymes (*i.e.* MshA and GT<sub>cp</sub>) share only  
156 17% overall sequence identity, the alignment was manually corrected by incorporating  
157 information such as predicted secondary structures and conserved functional residues.  
158 Multiple sequence alignment of GT<sub>cp</sub> and its homologs revealed that GT<sub>cp</sub> contains a catalytic  
159 dyad composed of His104–Asp256, two conserved UDP-sugar binding motifs (GRVAXEKN  
160 and FPSXTDTFG), and a conserved Gly-rich motif, all of which are commonly found in the  
161 GT4 family (Fig. 1B) (24).

162

### 163 **Cloning of putative gene encoding GT<sub>cp</sub> and functional verification**

164 The recombinant plasmid pET22b–GT<sub>cp</sub> was constructed to purify the enzyme for  
165 determination of its catalytic properties. Soluble expression of His-tagged GT<sub>cp</sub> was achieved  
166 in *E. coli* BL21 (DE3) by adding 0.5 mM isopropyl- $\beta$ -D-thiogalactopyranoside (IPTG). The  
167 recombinant GT<sub>cp</sub> was purified to homogeneity by Ni–NTA affinity followed by gel filtration

168 chromatography using the Superdex 200 column. In SDS-PAGE analyses, the purified  
169 recombinant His-tagged GT<sub>cp</sub> was visible as a major band with a calculated mass of 38 kDa  
170 (Fig. 2A). The process used to purify GT<sub>cp</sub> is summarized in Table 1. The enzyme was purified  
171 3.5-fold with a yield of 17.1% and a specific activity of 47.1 U/mg. The predicted molecular  
172 mass of the monomeric form of GT<sub>cp</sub> is 38 kDa, but GT<sub>cp</sub> eluted as a peak corresponding to a  
173 molecular mass of approximately 70 kDa in the gel filtration chromatography experiments (Fig.  
174 2B). These results suggested that GT<sub>cp</sub> forms a dimer in solution, consistent with the proposed  
175 mechanism that oligomerization is a major factor contributing to the biochemical function and  
176 enzymatic activity of GTs (24).

177 We used two methods to determine the activity of purified GT<sub>cp</sub>. Previous studies have  
178 shown that thin-layer chromatography (TLC) can resolve these selected glycoacylglycerol  
179 standards (15, 16). Indeed, as shown in Fig. 3A, the products of the enzymatic reaction with  
180 MGlc-DAG, MGal-DAG, and MGlcA-DAG were observed by staining with sulfuric  
181 acid/methanol/water, and corresponded to the standard markers. These results showed that  
182 GT<sub>cp</sub> is able to transfer galactose, glucose, and hexuronic acid to the DAG acceptor using the  
183 respective UDP-sugars.

184 For structural identification, the glycoacylglycerol standards were analysed by liquid  
185 chromatography-mass spectrometry (LC-MS). LC-MS analyses (in the positive ion mode)  
186 detected an ammonium adduct (Fig. 3B-D) and fragmentation spectra for monohexuronosyl  
187 DAGs (MGlc-DAG and MGal-DAG) and MGlcA-DAG were obtained from the products of the  
188 GT<sub>cp</sub>-catalysed reactions. The calculated m/z of the parental ion of MGlc-DAG, MGal-DAG,  
189 and MGlcA-DAG was 756.3, 756.3, and 770.4, respectively. The two species differed in the  
190 neutral loss corresponding to the polar head group (179.0 and 193.1 m/z for the loss of the  
191 hexosyl group and the hexuronic acid group, respectively). In each case, this loss yielded a  
192 DAG-16:0/18:1 (m/z 577.3 or 577.4). A further two peaks corresponded to monoacylglycerol  
193 with glyceryl-16:0 (m/z 313.3 or 313.5) and -18:1 (m/z 339.3 or 339.4) fatty acids, respectively.  
194 These results demonstrated that GT<sub>cp</sub> shows high enzymatic activity towards the synthesis of  
195 MGlc-DAG, MGal-DAG, and MGlcA-DAG from DAG and UDP-sugars. Several bacterial lipid



196 GTs from *M. loti*, *A. tumefaciens*, *Mycoplasma pneumonia*, and *Mycoplasma genitalum* have  
197 been found to synthesize different glycoacylglycerolipids (DGal-DAG, GlcGal-DAG, and triglycosyl  
198 DAGs) using UDP-Glc and UDP-galactose (UDP-Gal) as sugar donors (15, 16, 25, 26). The  
199 *A. tumefaciens* GT Agt, which synthesizes neutral glycoacylglycerolipid (MGlc-DAG) and acidic  
200 glycoacylglycerolipid (MGlcA-DAG) with UDP-Glc or UDP-GlcA as the sugar donor, respectively,  
201 has been isolated and characterized (18). To the best of our knowledge, GT<sub>cp</sub> is the first  
202 bacterial lipid GT acting as a multifunctional enzyme to synthesize MGlc-DAG, MGal-DAG,  
203 and MGlcA-DAG with different UDP-sugars as donors. It remains to be seen whether bi-  
204 functional/multifunctional GT4 enzymes involved in glycoacylglycerolipid synthesis are a common  
205 trait in this group. At least one member of this family, the GT4 homologue in *Pseudomonas*  
206 sp. appears to be specific for UDP-glucose and does not accept UDP-galactose nor UDP-  
207 glucuronic acid as the substrate (Supplementary Figure S1).

208

### 209 **Catalytic properties of GT<sub>cp</sub>**

210 The catalytic activity of GT<sub>cp</sub> was tested with UDP-Glc as the sugar donor substrate and  
211 DAG as the potential acceptor substrate. The effect of temperature on GT<sub>cp</sub> activity was  
212 determined in the range of 10–50°C (Fig. 4A). GT<sub>cp</sub> showed maximum activity at around 35°C  
213 and more than half of maximum activity at 20–45°C. Calculation of the activation energy  $E_a$ .  
214 using the Arrhenius plot in a semi-logarithmic form ( $\ln v \rightarrow 1/T$ ) was shown in Fig. 4B, and the  
215 slope of the plot was used to calculate the activation energy which was  $E_a = 25.1 \text{ kJ mol}^{-1}$ . The  
216 thermostability of GT<sub>cp</sub> was evaluated at three different temperatures (30°C, 40°C, and 50°C)  
217 with increasing incubation times up to 120 min. Most of the enzyme activity was maintained  
218 after incubation at 40°C for at least 120 min, whereas incubation at 50°C for 30 min reduced  
219 activity by approximately 50% (Fig. 4C). To investigate the effect of pH on the enzymatic  
220 activity of GT<sub>cp</sub>, the enzymatic reaction was evaluated in different buffers (pH 7.0–11.0). The  
221 maximum activity of GT<sub>cp</sub> was at pH 8.5, and it retained more than 50% of maximum activity  
222 between pH 7.5 and 9.0 (Fig. 4D). Considering the significance of NaCl for marine enzymes,

223 enzyme activity was determined in the presence of NaCl at different concentrations. The  
224 recombinant GT<sub>cp</sub> maintained 54% of its maximum activity in the presence of 1.5 M NaCl and  
225 30% of its maximum activity when the NaCl concentration was increased to 4 M (Fig. 4E).

226 To investigate the substrate specificity of GT<sub>cp</sub> for DAGs, different species of varying chain  
227 length of DAGs were tested (Table 2). The  $k_m$  and  $k_{cat}$  values of GT<sub>cp</sub> were calculated from  
228 Hanes-Wolff plots and the Michaelis-Menten equation. For the DAGs with saturated fatty acid  
229 chains (di8:0, di10:0, di12:0, di14:0, di16:0, and di18:0), the  $k_m$ ,  $k_{cat}$ , and  $k_{cat}/k_m$  values  
230 increased with increasing acyl chain length. GT<sub>cp</sub> showed the higher activities for the  
231 unsaturated DAGs than for the saturated DAGs. The most preferred DAG substrate for GT<sub>cp</sub>  
232 was C16:0/C18:1 DAG, consistent with the fact that C16:0 and C18:1 fatty acids are common  
233 in marine bacteria (17, 18).

234 The Michaelis-Menten kinetic parameters for GT<sub>cp</sub> were determined using UDP-Glc, UDP-  
235 Gal, and UDP-GlcA as the sugar donors (Table 3). The  $K_m$  value for UDP-Glc (82  $\mu$ M) was  
236 higher than those for UDP-Gal and UDP-GlcA, consistent with the fact that UDP-Glc is the  
237 preferred substrate at physiological condition (27). The  $K_{cat}/K_m$  value for GT<sub>cp</sub> toward different  
238 sugar donors followed the order UDP-Glc (71.4 $\pm$ 2.7) >UDP-GlcA (59.6 $\pm$ 3.6) >UDP-Gal  
239 (32.2 $\pm$ 2.9). UDP-xylose, UDP-rhamnose, UDP-mannose and UDP-fructose were also tested  
240 with C16:0/C18:1 DAG, which showed no activity. Thus, GT<sub>cp</sub> exhibited the highest enzymatic  
241 activity for UDP-Glc among the sugar donors tested. In contrast with GT<sub>cp</sub>, the Pgts from *M.*  
242 *loti* and *A. tumefaciens* favour uridine UDP-Gal over UDP-Glc (15, 16). A comparison of GT<sub>cp</sub>  
243 kinetics with other biochemically characterized GT4 glycosyltransferases is listed in Table 4  
244 (22, 28-33).

245

#### 246 **Metal ions improve enzyme activity of GT<sub>cp</sub>**

247 The effect of various metal ions on the enzyme activity of GT<sub>cp</sub> is shown in Fig. 4F. Among  
248 the tested metal ions (5 mM), Mg<sup>2+</sup>, Ca<sup>2+</sup>, and Mn<sup>2+</sup> significantly stimulated GT<sub>cp</sub> activity by up  
249 to 223%, 125%, and 138%, respectively, although the as-isolated enzyme is already active  
250 Furthermore, EDTA did not significantly affect the enzymatic activity of GT<sub>cp</sub> after incubation

251 for 60 min at room temperature. The activity of GT<sub>cp</sub> was decreased by Ba<sup>2+</sup>, Cu<sup>2+</sup>, and Fe<sup>2+</sup> to  
252 52%, 23%, and 35%, respectively. Moreover, Hg<sup>2+</sup>, Cd<sup>2+</sup>, Ni<sup>2+</sup>, and Co<sup>2+</sup> completely abolished  
253 enzyme activity. This may have resulted from the binding of these metal ions to the -SH, -CO,  
254 and -NH moieties of the amino acids of GT<sub>cp</sub>, leading to structural changes and inactivation  
255 (34).

256 Given that Mg<sup>2+</sup> markedly improved the activity of GT<sub>cp</sub>, we determined metal content of  
257 the purified enzyme by inductively coupled plasma-mass spectrometry (ICP-MS) and found  
258 that Mg<sup>2+</sup>: protein molar ratio was < 0.03 (supplementary table 1). Similarly, no substantial  
259 amount of Ca, Mn or Zn was found in GT<sub>cp</sub>, suggesting that this enzyme is unlikely a  
260 metalloprotein. The kinetic parameters were subsequently determined using purified GT<sub>cp</sub> in  
261 the presence and absence of Mg<sup>2+</sup> (Table 3). In the presence of excess DAG, the K<sub>m</sub> value of  
262 GT<sub>cp</sub> decreased from 82 μM to 58 μM with the addition of Mg<sup>2+</sup>, indicating that GT<sub>cp</sub> has a  
263 higher affinity for UDP-Glu in the presence of Mg<sup>2+</sup>. The catalytic efficiency was nearly 2.0-fold  
264 higher than that in the absence of Mg<sup>2+</sup>. In the presence of excess UDP-Glc, the K<sub>m</sub> was almost  
265 unchanged with/without Mg<sup>2+</sup>. Metal ions are important regulators of physiological functions  
266 and contribute to the preservation of the structural integrity of some proteins (35). In contrast  
267 to GT-A fold GTs, GT-B fold GTs, including GT<sub>cp</sub>, are metal ion-independent (24). However,  
268 some studies have found that metal ions also change GT-B fold activity, such as GGT58A1  
269 from *Absidia coerulea* (36), UGT59A1 from *Rhizopus japonicas*, Bs-PUGT from *Bacillus*  
270 *subtilis* P118 (37), and human POFUT2 (38). In some cases, metal ion simultaneously  
271 interacts with both the enzyme and the sugar donor in the active site, which causes the  
272 glucosyl donor to realign in the active site, and thus affects the activity of the enzyme (39).  
273 Interestingly, although human POFUT2 is not a metalloprotein, Mg<sup>2+</sup>, Mn<sup>2+</sup> and Ca<sup>2+</sup> are also  
274 known to enhance the enzyme activity by facilitating the release of product from the enzyme  
275 (38). Therefore, it is tempting to speculate that the addition of Mg<sup>2+</sup> may also help enhance  
276 GT<sub>cp</sub> catalysis in a similar manner.

277

278 **Insights into structure and glycosylation mechanism of GT<sub>cp</sub>**

279 GT<sub>cp</sub>, along with the previously characterized Agt, form a group in the GT4 family and are  
280 GT-B fold GTs (Fig. 1, Fig. 5A). The GT-B fold GTs are thought to employ the so-called  
281 retaining glycosylation for adding the sugar unit to the substrate although some researchers  
282 have proposed an alternative internal return (S<sub>N</sub>*i*-like) mechanism (24, 40). In the latter model,  
283 the nucleophilic attack and the departure of the leaving group occur on the same face of the  
284 sugar, and involve the formation of a short-lived oxocarbenium-like transition state with  
285 asynchronous acceptor glycoside bond formation and phosphate bond breakdown (41-43).  
286 According to this latter model, two conserved amino acid residues are important for catalysis  
287 (e.g. Glu316 and His109 in MshA). In MshA, Glu316 and His109 act as catalytic nucleophiles  
288 in the S<sub>N</sub>*i*-like mechanism, and form hydrogen bonds with the OH-3 and OH-6 of the glucosyl  
289 moiety, respectively (22). Indeed, we also found the corresponding residues (Asp256, His104)  
290 in GT<sub>cp</sub> (Fig. 1B). Asp256 and His104 fulfil a critical role in GT<sub>cp</sub> catalysis, because their  
291 substitution to Ala completely abolished catalytic activity (Fig. 5B). Interestingly, mutation of  
292 the conserved Asp residue at position 256 to Glu (D256E) reduced activity by more than 90%  
293 even though both Asp and Glu residues have a carboxylic acid moiety. Asp256 is essential for  
294 the enzymatic activity of GT<sub>cp</sub> and cannot be replaced by Glu, indicating that the length of the  
295 side chain of this residue is important for the activity of GT<sub>cp</sub>. These results suggested that  
296 Asp256 and His104 play important functions in glycosyl transfer while maintaining the α-  
297 configuration of the anomeric carbon. To confirm the glycosylated position and the anomeric  
298 stereoselectivity, MGlc-DAG was purified and analysed by <sup>1</sup>H-nuclear magnetic resonance  
299 (NMR) (Fig. 5C). The glucosyl moiety of the glycolipid was suggested by the characteristic  
300 signals for Glc-H1 (δH 5.17, 1H) and Glc-H2–6 (δH 3.20 to 3.70, 6H) by <sup>1</sup>H NMR. The location  
301 of the glucosyl moiety was indicated by the correlation between Glc-H1 and C-3 (δH 136.0) in  
302 the heteronuclear multiple bond correlation (HMBC) spectrum. The large coupling constant  
303 (J=3.7Hz) of Glc-H1 revealed the α-D-configuration of the glycosidic linkage.

304 In terms of the donor binding pocket, GT4 family GTs have two highly conserved  
305 sequence motifs in their C-terminal domain that are involved in the binding of the sugar  
306 nucleotide with the UDP moiety (23, 29, 44). The sequence alignment analyses indicated that

307 GT<sub>cp</sub> and its homologs have these two conserved motifs in the donor binding pocket (Fig. 1B),  
308 consistent with other GT4 proteins. The highly conserved sites were further investigated to  
309 illuminate the mechanism of sugar donor binding (Fig. 5A). Each of the potential active sites  
310 in the donor binding pocket (Gly16, Gly82, Gly85, Arg190, Lys195, Thr257, Phe258, Gly259,  
311 and Glu264) was mutated to Ala. Enzymatic activity of GT<sub>cp</sub> in all the mutants was almost  
312 completely abolished, supporting our assumption from the homology model that these  
313 residues are integral to the sugar donor binding site (Fig. 5B). Thr257 in the structure of GT<sub>cp</sub>  
314 corresponds to MshA residue Ser317, which interacts with the 4-OH of the sugar moiety and  
315 forms hydrogen bonds (22). When the residue at position 257 (Thr) in GT<sub>cp</sub> was substituted  
316 with Ser (T257S), the T257S mutant exhibited approximately 1.6-times higher activity than  
317 that of wild-type GT<sub>cp</sub>. Compared with the parental residue Thr, Ser has one fewer methyl  
318 group; therefore, there is more free space between the Ser residue and the substrate (45).  
319 The generated space might allow more room for the appropriate interaction between the Ser  
320 residue and the sugar donor. These findings indicate that the mechanism of the sugar donor  
321 recognition of GT<sub>cp</sub> is similar to that of known GT-B fold GTs, such as MshA. That is, the  
322 conserved key residues would form hydrogen bonds with the UDP part and interact with the  
323 sugar moiety of the sugar donor.

324 In order to identify potential residues involved in binding of DAG, we docked C16:1/C18:0  
325 DAG into the homology model of GT<sub>cp</sub>. DAG is predicted to lay in the groove of the open  
326 structure in the model (Fig. 6A, B). Docked DAG interacts with several key residues primarily  
327 through hydrophobic interactions but also some polar interactions e.g. His104, Thr162 and  
328 Arg163 and Trp320 (Fig. 6C), of which His104, Arg163 and Trp320 are strictly conserved in  
329 GT<sub>cp</sub> in a range of bacteria (Fig. 1B). Indeed, the His104, Arg163 and Trp320 mutants are  
330 inactive, supporting a key role in GT<sub>cp</sub> catalysis (Fig. 5B). Subsequent independent docking of  
331 the three UDP-sugars predicted the identical binding pocket for all three (Fig.6D) in the  
332 presence of already docked DAG and with UDP-galactose as an example we observe the  
333 DAG and UDP-sugars positioned parallel to one another in the 'open state' (Fig. 6 E). To the

334 best of our knowledge, our study provides the first insight of the binding pocket of DAG in a  
335 GT4 glycosyltransferase involved in glycoacylglycerol lipid biosynthesis.

336 In MshA, the hydrophobic residue Leu76 helps to stabilize the dimer (22). This residue  
337 corresponds to Leu56 in GT<sub>cp</sub> (Fig 1B). To investigate the role of Leu56 in GT<sub>cp</sub>, a site-directed  
338 mutant to Ala was made. The mutant L56A protein was loaded onto a Superdex 200 column  
339 to analyse its oligomeric state. The eluted peaks of L56A mutant corresponded to the  
340 monomer of GT<sub>cp</sub> (38 kDa) according to their elution volumes (Fig. 2B). No difference was  
341 observed between the wild-type profile and the other mutants during protein purification (data  
342 not shown). The mutant L56A showed approximately 85% of wild-type GT<sub>cp</sub> activity. Structural  
343 studies revealed that most of the residues involved in oligomerization are conserved with  
344 related GTs, and they appear to be primarily hydrophobic and aromatic residues that form an  
345 extensive hydrophobic interface between the monomers (46). These results demonstrated  
346 that residue Leu56 is essential for the stable dimerization of the protein, but does not play a  
347 direct role in the catalytic reaction of GT<sub>cp</sub>.

348 To conclude, our data show that the activity of purified GT<sub>cp</sub> from the marine bacterium  
349 *Candidatus Pelagibacter* sp. HTCC7211 is sufficient for the synthesis of several  
350 glycoacylglycerol lipids, including MGlc-DAG, MGal-DAG and MGlcA-DAG. The ability to  
351 synthesize MGlc-DAG and MGlcA-DAG suggest that GT<sub>cp</sub> may play an important role in lipid  
352 remodelling in natural marine systems. GT<sub>cp</sub> and PlcP, a manganese-dependent  
353 metallophosphoesterase, are organized in an operon-like structure in numerous marine  
354 heterotrophic bacteria (17, 18). Upon phosphorus (P) deficiency, PlcP selectively degrades  
355 phospholipids such as phosphatidylglycerol (PG) and phosphatidylethanolamine (PE) to DAG,  
356 which then serves as the substrate for the biosynthesis of these glycolipids by GT<sub>cp</sub> using UDP-  
357 Glc, UDP-Gal, or UDP-GlcA as sugar donors (Fig. 7). Both the phospholipid PG and the  
358 glycoacylglycerol lipid MGlc-DAG are anionic under physiological conditions and it is likely that they  
359 could be interchangeable while maintaining the desirable biophysical properties of the  
360 membrane. Indeed, this has also been documented in the SAR11 strain HTCC7211 (17, 18).

361 Similarly, substitution of PG by the anionic sulfur-containing glycolipid SQDG has also been  
362 shown for marine cyanobacteria and phytoplankton (47). Together, our work thus points to the  
363 important role of glycosyltransferases as key enzymes in the synthesis of glycoacylglycerolipid in  
364 marine bacteria.

365

366

## 367 **Materials and Methods**

### 368 **General materials and microorganisms**

369 We purchased UDP-glucose (UDP-Glc), UDP-galactose (UDP-Gal), UDP-glucuronic  
370 acid (UDP-GlcA), UDP-xylose, UDP-rhamnose, UDP-mannose, UDP-fructose and  
371 diacylglycerols (DAGs) from Sigma-Aldrich Co. (St. Louis, MO, USA). Nickel column and  
372 Superdex 200 gel filtration columns were from GE Healthcare (Buckinghamshire, UK). All  
373 other chemicals were of the highest reagent grade and were obtained from Sangon (Shanghai,  
374 China). The *E. coli* strains JM109 for DNA manipulation and BL21-CodonPlus (DE3)-RIL for  
375 protein expression were obtained, respectively, from TaKaRa Bio, Inc. (Dalian, China) and  
376 Stratagene (La Jolla, CA, USA).

377

### 378 **Cloning, expression, and purification of $GT_{cp}$**

379 The gene  $GT_{cp}$  from *Candidatus Pelagibacter* sp. HTCC7211 was codon-optimized and  
380 chemically synthesized by Sangon (Shanghai, China). Several site-directed  $GT_{cp}$  mutants  
381 (encoding mutations G16A, L56A, G82A, G85A, H104A, T162A, R163A, R190A, K195A,  
382 D256A, D256E, T257A, T257S, F258A, G259A, E264A and W320A) were constructed using  
383 the overlapping PCR method with the common primers as for the wild-type  $GT_{cp}$  and two site-  
384 specific primers for each mutant (Table 5). The genes were then cloned into the pET22b  
385 expression vector using *Nco*I and *Sal*I restriction sites, and transformed into the host *E. coli*  
386 BL21-CodonPlus (DE3)-RIL for gene expression. The transformed cells were grown in LB  
387 medium containing 100 mg/l ampicillin and 34 mg/l chloramphenicol at 37°C with shaking at  
388 180 rpm. When the cultures reached an OD 600 of 0.6, IPTG was added to a final



389 concentration of 0.5 mM. After a further 4 h of growth at 37°C, the cells were harvested by  
390 centrifugation and lyophilized by vacuum-freezing. The harvested cells were re-suspended in  
391 buffer A (50 mM Tris–HCl, pH 7.9, 50 mM NaCl), with 1% (w/v) of triton X-100, and then  
392 disrupted by sonication. The cell mixture was then centrifuged at 12,000×g for 30 min, and the  
393 soluble fraction was loaded onto a nickel column (GE Healthcare) pre-equilibrated with buffer  
394 A. The recombinant enzymes were eluted with elution buffer (20 mM Tris–HCl, pH 7.9, 500  
395 mM NaCl, 300 mM imidazole) and dialyzed overnight in buffer A to remove imidazole. For  
396 further purification, the enzymes were loaded on a Superdex 200 (16/60) gel filtration column  
397 (GE Healthcare), which was pre-equilibrated with buffer B (50 mM Tris–HCl, pH 7.9, 200 mM  
398 NaCl). The fraction size was 0.5 ml and the flow rate was 0.5 ml/min. The peak fractions were  
399 collected, concentrated, and analysed by SDS-PAGE (12% polyacrylamide). The protein  
400 concentration was determined using the Bradford method. The purified protein was stored in  
401 buffer A containing 25% glycerol at –80°C. SDS-PAGE gels and circular dichroism (CD)  
402 spectroscopy analyses of the purified protein and the mutants are shown in supplementary  
403 Figure S2.

404

#### 405 **Bioinformatics and homology modelling**

406 A putative GT gene encoding GT<sub>cp</sub> was identified in the genome of *Candidatus Pelagibacter*  
407 sp. HTCC7211 (GenBank accession no. WP\_008545403.1). ClustalW2 software  
408 (<http://www.ebi.ac.uk/Tools/clustalw2/index.html>) was used for multiple sequence alignment  
409 analysis of GT<sub>cp</sub> (48). For the phylogenetic analysis, we used the neighbour-joining method  
410 and Molecular Evolutionary Genetic Analysis 7.1 software (MEGA, version 7.1) (49). The  
411 three-dimensional model structure of GT<sub>cp</sub> was generated using tools at the Phyre 2 protein  
412 modelling server (50) and the crystal structure of MshA (Protein Data Bank [PDB] entry 3C4Q)  
413 from *C. glutamicum* as the template. Docking of UDP-Gla/UDP-Glc/UDP-GlcA with GT<sub>cp</sub> was  
414 predicted using the Flexible Docking module in Accelrys Discovery studio (51, 52), and the  
415 protein model was imported into Flare (v3.0, Cresset) for docking the DAG substrate and firstly  
416 energy minimized with 2000 iterations with a cut off of 0.200 kcal/mol/Å. The DAG lipid was



417 imported as a ligand and energy minimized in Flare before being docked into the active site  
418 and the best scoring pose selected. Thereafter we utilised the DAG docked ligand with the  
419 model as the basis for the follow up *in silico* docking of UDP-sugars in the presence of the  
420 DAG.

421

### 422 **Enzyme activity assay**

423 The enzymatic activity of GT<sub>cp</sub> was measured using 0.1 mM UDP-Glc (or UDP-Gal, or  
424 UDP-GlcA) and 0.1 mM DAG as the substrate and 2.0 μM purified enzyme in 10 mM  
425 Tricine/KOH, pH 8.5, 2 mM DTT. The resulting mixture (500 μl) was incubated at 35°C for 60  
426 min with constant shaking at 200 rpm. The products (glycoglycerolipids and DAGs) were  
427 extracted using the Floch method with methanol-chloroform-water at a ratio of 1:2:0.6  
428 (vol/vol/vol). The lipid extract was dried under nitrogen as at room temperature. The dried  
429 lipids were resuspended in acetonitrile and ammonium acetate (10 mM, pH 9.2) at a ratio of  
430 95:5 (vol/vol) and analysed by LC-MS. One unit of enzymatic activity was defined as the  
431 amount of enzyme required to catalyse the conversion of 1 μmol DAG per min under the  
432 standard conditions. The measurements were corrected for background hydrolysis in the  
433 absence of the enzyme. The  $K_m$  and  $V_{max}$  values were calculated using Hanes-Wolff plots with  
434 various concentrations of substrate (0.02 to 1.0 mM) and three replicates.

435

### 436 **Lipid analysis by TLC and LC-MS**

437 The GT<sub>cp</sub>-synthesized glycoglycerolipids were analysed by TLC using a Camag Automatic  
438 TLC Sampler III (Camag, Muttenz, Switzerland) for spotting. Glycoglycerolipids were  
439 separated on silica gel 60 (Merck, Darmstadt, Germany) with chloroform/methanol/water  
440 (65:35:4 vol/vol), and stained with sulfuric acid/methanol/water (45:45:10 vol/vol) for  
441 visualization. The resulting solutions were further analysed by high-performance liquid  
442 chromatography using a 1290 Infinity II UPLC instrument (Agilent Corp., Santa Clara, CA,  
443 USA) coupled with an AB SCIEX Triple Quad™5500 (AB SCIEX, Framingham, MA, USA)  
444 equipped with an electrospray-ion (ESI) detector. A BEH Amide XP column (2.5-μm inner

445 diameter, 3 mm by 150 mm, Waters, Milford, MA, USA) was used for chromatographic  
446 separation. The mobile phase consisted of acetonitrile (solvent A) and 10 mM ammonium  
447 acetate, pH 9.2 (solvent B). The column was equilibrated for 10 min with 95% A: 5% B prior  
448 to sample injection. The separation was conducted using a stepwise gradient starting from 95%  
449 A: 5% B to 70% A: 30% B after 15 min with a constant flow rate of 150  $\mu\text{l min}^{-1}$ . Mass  
450 spectrometric analysis was performed in the ESI positive ion mode with the ion spray voltage  
451 at 3500 V and temperature at 350°C. The nebulizer gas and heater gas were set at 40 psi. The  
452 analytical data were processed by Analyst software (version 1.6.3).

453

#### 454 **Inductively coupled plasma-mass spectrometry (ICP-MS)**

455 The metal content of  $\text{GT}_{\text{cp}}$  was measured by using an ICP-MS (Agilent Technologies 7900  
456 ICP-MS). The standards for calibration were freshly prepared by diluting Ca, Mg, Mn, Zn and  
457 S stock solution (at 1000  $\text{mg}\cdot\text{L}^{-1}$ ; Sigma-Aldrich, Saint Louis, MO, USA) with 1% (v/v) nitric  
458 acid with concentrations from 0.1 to 2.0  $\text{mg}\cdot\text{L}^{-1}$  for Ca, Mg, Mn, Zn, and from 1 to 25  $\text{mg}\cdot\text{L}^{-1}$  for  
459 S. About 3.0 mg protein was digested in 1% (v/v) nitric acid matrix for metal analyses. The  
460 content of S was quantified in order to determine the protein concentration. The contents of  
461 Ca, Mg, Mn, Zn and S were measured using the emission lines of 396.847 nm (Ca), 280.270  
462 nm (Mg), 259.373 nm (Mn), 213.856 nm (Zn) and 180.669 nm (S) respectively.

463

#### 464 **Nuclear magnetic resonance spectroscopy (NMR) spectroscopy**

465 NMR spectroscopy experiments were carried out in  $\text{CDCl}_3$  with tetramethylsilane as an internal  
466 standard.  $^1\text{H}$ ,  $^{13}\text{C}$ , DEPT, COSY, HSQC, HMBC and ROESY experiments were recorded at  
467 298 K with 600 MHz spectrometer (Bruker Avance 600, Bruker). Bruker standard software  
468 Topspin 3.2 was applied to acquire and process all the spectra data. COSY and ROESY  
469 experiments were recorded using data sets ( $t_1$  by  $t_2$ ) of 2048 by 256 points, COSY with 4 and  
470 ROESY with 16 scans.

471

#### 472 **Characterization of recombinant $\text{GT}_{\text{cp}}$**

473 The optimum temperature of GT<sub>cp</sub> was measured in Tricine/KOH buffer (pH 8.5) in the  
474 range of 10–50 °C. The buffer was adjusted to pH 8.5 for each of the assayed temperatures.  
475 The activation energy of the cleavage reaction was calculated using the logarithmic form of  
476 the Arrhenius equation:  $\ln K_{cat} = \ln K_0 - E_a/R \cdot T$ . The effect of pH on enzymatic activity was tested  
477 at 35°C for pH values in the range of 7.0–11.0. The following buffers were used: sodium  
478 phosphate (pH 6.0–7.5), Tricine/KOH (pH 7.5–9.5), and N-cyclohexyl-3-aminopropanesulfonic  
479 acid (CAPS, pH 9.5–11.0). The thermostability of the purified GT<sub>cp</sub> was examined by  
480 incubating the enzyme in 50 mM Tricine/KOH buffer (pH 8.5) at three different temperatures  
481 (30, 40, and 50 °C). Samples (80 µL) of the enzyme were collected after incubation periods of  
482 30, 60, 90, and 120 min at each temperature and the residual activity of each sample was  
483 assayed under standard conditions. The enzymatic activity of GT<sub>cp</sub> was also measured in the  
484 presence of various metal salts (MnCl<sub>2</sub>, ZnCl<sub>2</sub>, MgCl<sub>2</sub>, CaCl<sub>2</sub>, BaCl<sub>2</sub>, CdCl<sub>2</sub>, HgCl<sub>2</sub>, CuCl<sub>2</sub>,  
485 FeSO<sub>4</sub>, NiSO<sub>4</sub>, and CoCl<sub>2</sub>) at 5 mM or 5 mM EDTA. To determine the salt stability of the  
486 enzyme, 0–4 M NaCl (final concentration) was added to the reaction mixture and enzyme  
487 activity was determined using optimum conditions.

488

#### 489 Data availability

490 The authors confirm that the data supporting the findings of this study are available within the  
491 article and its supplementary materials.

492

#### 493 **Acknowledgements**

494 This project has received funding from the European Research Council (ERC) under the  
495 European Union's Horizon 2020 research and innovation programme (grant agreement no.  
496 726116), Royal Society International Exchanges 2017 Cost Share (China) (IEC\NSFC\170213;  
497 grant agreement no. 170213) , Program for Science & Technology Innovation Talents in the  
498 Universities of Henan Province (18HASTIT040) and Projects of science and technology  
499 activities for overseas students from department of human resources and social security of  
500 Henan Province (2019-3)

## 501 References

- 502 1. Cheng-Sánchez I, Sarabia F. 2018. Chemistry and biology of bioactive glycolipids of  
503 marine origin. *Mar drugs* 16:294.  
504
- 505 2. Hölzl G, Dörmann, P. 2007. Structure and function of glycoglycerolipids in plants and  
506 bacteria. *Prog. Lipid Res* 46:225–243.  
507
- 508 3. Kolter, TA. 2011. View on sphingolipids and disease. *Chem Phys Lipids* 164:590-606.  
509
- 510 4. Chirasuwan N, Chaiklahan R, Kittakoop P, Chanasattru W, Ruengjitchatchawalya M,  
511 Tanticharoen M, Bunnag B. 2009. Anti HSV-1 activity of sulphoquinovosyl diacylglycerol  
512 isolated from *Spirulina platensis*. *Sci Asia* 35:137–141.  
513
- 514 5. Bergé JP, Debiton E, Dumay J, Durand P, Barhomeuf C. 2002. In vitro anti-inflammatory  
515 and anti-proliferative activity of sulfolipids from the red alga *Porphyridium cruentum*. *J Agric*  
516 *Food Chem* 50: 6227–6232.  
517
- 518 6. Hölzl G, Dörmann P. 2007. Structure and function of glycoglycerolipids in plants and bacteria.  
519 *Prog Lipid Res* 46:225–243.  
520
- 521 7. Semeniuk A, Sohlenkamp C, Duda K, Hölzl G. 2014. A bifunctional glycosyltransferase from  
522 *Agrobacterium tumefaciens* synthesizes monoglucosyl and glucuronosyl diacylglycerol under  
523 phosphate deprivation. *J Biol Chem* 289:10104–10114.  
524
- 525 8. Zhang J, Li CX, Yu GL, Guan HS. 2014. Total synthesis and structure-activity relationship  
526 of glycoglycerolipids from marine organisms. *Mar drugs* 12:3634-3659.  
527
- 528 9. Lairson LL, Henrissat B, Davies GJ, Withers SG. 2008. Glycosyltransferases: structures,  
529 functions, and mechanisms. *Annu Rev Biochem* 77:521-55.  
530
- 531 10. Lombard V, Ramulu HG, Drula E, Coutinho PM, Henrissat, B. 2014. The carbohydrate-  
532 active enzymes database (CAZy) in 2013. *Nucleic Acids Res* 42:D490–D495.  
533
- 534 11. Coutinho PM, Deleury E, Davies GJ, Henrissat B. 2003. An evolving hierarchical family  
535 classification for glycosyltransferases. *J Mol Biol* 328:307–317.  
536
- 537 12. Berg S, Edman M, Li L, Wikström M, Wieslander, A. 2001. Sequence properties of the 1,2-  
538 diacylglycerol 3-glucosyltransferase from *Acholeplasma laidlawii* membranes. Recognition of  
539 a large group of lipid glycosyltransferases in eubacteria and archaea. *J Biol Chem* 276:22056–  
540 22063.  
541
- 542 13. Hölzl G, Zähringer U, Warnecke D, and Heinz E. 2005. Glycoengineering of cyanobacterial  
543 thylakoid membranes for future studies on the role of glycolipids in photosynthesis. *Plant Cell*  
544 *Physiol* 46:1766–1778.  
545
- 546 14. Ostberg Y, Berg S, Comstedt P, Wieslander A, Bergström S. 2007. Functional analysis of  
547 a lipid galactosyltransferase synthesizing the major envelope lipid in the Lyme disease  
548 spirochete *Borrelia burgdorferi*. *FEMS Microbiol Lett* 272:22–29.  
549
- 550 15. Hölzl G, Leipelt M, Ott C, Zähringer U, Lindner B, Warnecke D, Heinz E. 2005. Processive  
551 lipid galactosyl/glucosyltransferases from *Agrobacterium tumefaciens* and *Mesorhizobium loti*  
552 display multiple specificities. *Glycobiology* 15:874–886.  
553

- 554 16. Devers EA, Wewer V, Dombink I, Dörmann P, Hölzl G. 2011. A processive  
555 glycosyltransferase involved in glycolipid synthesis during phosphate deprivation in  
556 *Mesorhizobium loti*. J Bacteriol 193:1377–1384.  
557
- 558 17. Carini P, Van Mooy BA, Thrash JC, White A, Zhao Y, Campbell EO, Fredricks HF,  
559 Giovannoni SJ. 2015. SAR11 lipid renovation in response to phosphate starvation. Proc Natl  
560 Acad Sci U S A 112:7767–7772.  
561
- 562 18. Sebastián M, Smith AF, González JM, Fredricks HF, Van Mooy B, Koblížek M, Brandsma  
563 J, Koster G, Mestre M, Mostajir B, Pitta P, Postle AD, Sánchez P, Gasol JM, Scanlan DJ, Chen  
564 Y. 2016. Lipid remodelling is a widespread strategy in marine heterotrophic bacteria upon  
565 phosphorus deficiency. ISME J 10:968–978.  
566
- 567 19. Van Mooy BA, Fredricks HF, Pedler BE, Dyhrman ST, Karl DM, Koblížek M, Lomas MW,  
568 Mincer TJ, Moore LR, Moutin T, Rappé MS, Webb EA. 2009. Phytoplankton in the ocean use  
569 non-phosphorus lipids in response to phosphorus scarcity. Nature 458:69–72.  
570
- 571 20. Smith AF, Rihtman B, Stirrup R, Silvano E, Mausz MA, Scanlan DJ, Chen Y. 2019.  
572 Elucidation of glutamine lipid biosynthesis in marine bacteria reveals its importance under  
573 phosphorus deplete growth in *Rhodobacteraceae*. ISME J 13:39–49.  
574
- 575 21. Wei T, Quareshy M, Zhang YZ, Scanlan DJ, Chen, Y. 2018. Manganese is essential for  
576 PlcP metallophosphoesterase activity involved in lipid remodelling in abundant marine  
577 heterotrophic bacteria. Appl Environ Microbiol 84:01109-18.  
578
- 579 22. Vetting MW, Frantom PA, and Blanchard JS. 2008. Structural and enzymatic analysis of  
580 MshA from *Corynebacterium glutamicum*: substrate-assisted catalysis. J Biol Chem  
581 283:15834–15844.  
582
- 583 23. Guerin ME, Kordulakova J, Schaeffer F, Svetlikova Z, Buschiazzi A, Giganti D, Gicquel B,  
584 Mikusova K, Jackson M, Alzri PM. 2007. Molecular recognition and interfacial catalysis by the  
585 essential phosphatidylinositol mannosyltransferase PimA from *Mycobacteria*. J Biol Chem  
586 282:20705-20714.  
587
- 588 24. Liang DM, Liu JH, Wu H, Wang BB, Zhu HJ, Qiao JJ. 2015. Glycosyltransferases:  
589 mechanisms and applications in natural product development. Chem Soc Rev 44: 8350–8374.  
590
- 591 25. Andrés E, Martínez N, Planas A. 2011. Expression and characterization of a *Mycoplasma*  
592 *genitalium* glycosyltransferase in membrane glycolipid biosynthesis: Potential target against  
593 *Mycoplasma* infections. J Biol Chem 286:35367–35379.  
594
- 595 26. Klement ML, Ojemyr L, Tagscherer KE, Widmalm G, Wieslander A. 2007. A processive  
596 lipid glycosyltransferase in the small human pathogen *Mycoplasma pneumoniae*: involvement  
597 in host immune response. Mol Microbiol 65:1444–1457.  
598
- 599 27. Forget SM, Shepard SB, Soleimani E, Jakeman DL. 2019. On the catalytic activity of a  
600 GT1 family glycosyltransferase from *Streptomyces venezuelae* ISP5230. J Org Chem  
601 84:11482-11492.  
602
- 603 28. Gu XL, Chen M, Wang QZ, Zhang M, Wang BL, Wang HH. 2005. Expression and  
604 purification of a functionally active recombinant GDP-mannosyltransferase (PimA) from  
605 *Mycobacterium tuberculosis* H37Rv. Protein Expr Purif 42:47-53.  
606
- 607 29. Batt SM, Jabeen T, Mishra AK, Veerapen N, Krumbach K, Eggeling L, Besra GS, Fütterer  
608 k. 2010. Acceptor substrate discrimination in phosphatidyl-myo-inositol mannoside synthesis:

- 609 structural and mutational analysis of mannosyltransferase *Corynebacterium glutamicum*  
610 PimB'. *J Biol Chem* 285:37741-37752.  
611
- 612 30. Sobhanifar S, Worrall LJ, Gruninger RJ, Wasney GA, Blaukopf M, Baumann L, Lameignere  
613 E, Solomonson M, Brown ED, Withers SG, Strynadka NCJ. 2015. Structure and mechanism  
614 of *Staphylococcus aureus* TarM, the wall teichoic acid  $\alpha$ -glycosyltransferase. *Proc Natl Acad*  
615 *Sci USA* 112:576-585.  
616
- 617 31. Royer CJ, Cook PD. A structural and functional analysis of the glycosyltransferase BshA  
618 from *Staphylococcus aureus*: insights into the reaction mechanism and regulation of bacillithiol  
619 production. *Protein Sci* 28:1083-1094.  
620
- 621 32. Shi WW, Jiang YL, Zhu F, Yang YH, Shao QY, Yang HB, Ren YM, Wu H, Chen YX, Zhou  
622 CZ. 2014. Structure of a novel O-Linked N-acetyl-D-glucosamine (O-GlcNAc) transferase, GtfA,  
623 reveals insights into the glycosylation of pneumococcal serine-rich repeat adhesions. *J Biol*  
624 *Chem* 289:20898-20907.
- 625 33. Troutman JM, Imperiali B. 2009. *Campylobacter jejuni* PglH is a single active site  
626 processive polymerase that utilizes product inhibition to limit sequential glycosyl transfer  
627 reactions. *Biochemistry* 48:2807-2816.
- 628
- 629 34. Li Y, Li W, Zhang G, Lü X, Hwang H, Aker WG, Wang P. 2016. Purification and  
630 characterization of polysaccharides degradases produced by *Alteromonas* sp. A321. *Int J Biol*  
631 *Macromol* 86:96–104.  
632
- 633 35. Zhang S, Zhou Z, Yao Z, He BF. 2013. Efficient production of skimmin and 6'-  
634 succinylskimmin from umbelliferone by organic solvent-tolerant *Bacillus licheniformis* ZSP01  
635 using nitrogen sources regulation strategy. *Biochem Eng J* 71:105-110.  
636
- 637 36. Xie K, Dou X, Chen R, Chen D, Fang C, Xiao Z, Dai J. 2017. Two novel fungal phenolic  
638 UDP glycosyltransferases from *Absidia coerulea* and *Rhizopus japonicus*. *Appl Environ*  
639 *Microbiol* 83: e03103-16.  
640
- 641 37. Kitayska T, Petrova P, Ivanova V, Tonkova AI. 2011. Purification and properties of a new  
642 thermostable cyclodextrin glucanotransferase from *Bacillus pseudocaliphilus* 8SB. *Appl*  
643 *Biochem Biotechnol* 165:1285-1295.  
644
- 645 38. Chen CI, Keusch JJ, Klein D, Hess D, Hofsteenge J, Gut H. 2012. Structure of human  
646 POFUT2: insights into thrombospondin type 1 repeat fold and O-fucosylation. *EMBO J*  
647 31:3183–3197.  
648
- 649 39. Pruitt RN, Chumbler NM, Rutherford SA, Farrow MA, Friedman DB, Spiller B, and Lacy  
650 DB. 2012. Structural determinants of *Clostridium difficile* toxin A glycosyltransferase activity. *J*  
651 *Biol Chem* 287:8013–8020.  
652
- 653 40. Albesa-Jove D, Guerin ME. 2016. The conformational plasticity of glycosyltransferases.  
654 *Curr Opin Struct Biol* 40:23–32.  
655
- 656 41. Errey JC, Lee SS, Gibson RP, Fleites CM, Barry CS, Jung PMI, O'Sullivan AC, Davis BG,  
657 Davies GJ. 2010. Mechanistic insight into enzymatic glycosyl transfer with retention of  
658 configuration through analysis of glycomimetic inhibitors. *Angew Chem Int Ed Engl* 49:1234-  
659 1237.  
660



- 661 42. Gómez H, Polyak I, Thiel W, Lluch JM, Masgrau L. 2012. Retaining glycosyltransferase  
662 mechanism studied by QM/MM methods: lipopolysaccharyl-a-1, 4-galactosyltransferase C  
663 transfers agalactose via an oxocarbenium ion-like transition state. *J Am Chem Soc*134:4743-  
664 4752.  
665
- 666 43. Lee SS, Hong SY, Errey JC, Izumi A, Davies GJ, Davis BG. 2011. Mechanistic evidence  
667 for a front-side,  $S_Ni$ -type reaction in a retaining glycosyltransferase. *Nat Chem Biol* 7:631-638.  
668
- 669 44. Guerin ME, Kaur D, Somashekar BS, Gibbs S, Gest P, Chatterjee D, Brennan PJ, Jackson  
670 M. 2009. New insights into the early steps of phosphatidylinositol mannoside biosynthesis in  
671 *mycobacteria*: PimB' is an essential enzyme of *Mycobacterium smegmatis*. *J Biol Chem*  
672 284:25687–25696.  
673
- 674 45. Honda Y, Nakano S, Ito S, Dadashpour M, Zhang ZL, Kawarabayasi Y. 2018. Improvement  
675 of ST0452 N-Acetylglucosamine-1-phosphate uridyltransferase activity by the cooperative  
676 effect of two single mutations identified through structure-based protein engineering. *Appl*  
677 *Environ Microbiol*84:e02213-18.  
678
- 679 46. Chiu CP, Lairson LL, Gilbert M, Wakarchuk WW, Wither SG, Strynadka NC. 2007.  
680 Structural analysis of the  $\alpha$ -2, 3-Sialyltransferase Cst-I from *Campylobacter jejuni* in apo and  
681 substrate-analogue bound forms'. *Biochemistry* 46:7196-7204.  
682
- 683 47. Van Mooy, BAS, Rocap, G, Fredricks, HF, Evans, CT, Devol, AH. 2006. Sulfolipids  
684 dramatically decrease phosphorus demand by picocyanobacteria in oligotrophic marine  
685 environments. *Proc Natl Acad Sci USA* 103: 8607–8612.  
686
- 687 48. Larkin MA, Blackshields G, Brown NP, Chenna R, McGettigan PA, McWilliam H, Valentin  
688 F, Wallace IM, Wilm A, Lopez R, Thompson JD, Gibson TJ, Higgins DG. 2007. Clustal W and  
689 Clustal X version 2.0. *Bioinformatics* 23: 2947-2948.  
690
- 691 49. Kumar S, Stecher G, Tamura K. 2016. MEGA7: molecular evolutionary genetics analysis  
692 version 7.0 for bigger datasets. *Mol BiolEvol* 33:1870–1874.  
693
- 694 50. Kelly L, Mezulis S, Yates C, Wass M, Sternburg M. 2015. The Phyre2 web portal for protein  
695 modelling, prediction and analyses. *Nat Protoc* 10:845–858.  
696
- 697 51. Hodis E, Sussman JL. 2009. An encyclopedic effort to make 3D structures easier to  
698 understand. *Trends Biochem Sci* 34:100–101.  
699
- 700 52. Diller DJ, Merz KM, Jr. 2001. High throughput docking for library design and library  
701 prioritization. *Proteins* 43:113–124.

702 **Tables**

703 **Table 1** Purification of the recombinant GT<sub>cp</sub> from *Candidatus Pelagibacter* sp. HTCC7211

| <i>Step</i>                 | <i>Total protein (mg)</i> | <i>Total activity (U)</i> | <i>Specific activity (U/mg)</i> | <i>Purification fold</i> | <i>Yield (%)</i> |
|-----------------------------|---------------------------|---------------------------|---------------------------------|--------------------------|------------------|
| Crude cell extract          | 34.8                      | 469                       | 13.4                            | 1                        | 100              |
| Ni-NTA affinity             | 1.9                       | 85                        | 44.7                            | 3.3                      | 18.1             |
| Superdex-200 gel filtration | 1.7                       | 80                        | 47.1                            | 3.5                      | 17.1             |

704

705 **Table 2** Kinetic parameters of GT<sub>cp</sub> using UDP-Glc, UDP-Gal and UDP-GlcA as sugar donors and different  
706 DAG as acceptors <sup>a</sup>.

| <i>Substrate</i>                        | <i>k<sub>cat</sub> (min<sup>-1</sup>)</i> | <i>K<sub>m</sub> (μM)</i> | <i>k<sub>cat</sub>/K<sub>m</sub> (min<sup>-1</sup> mM<sup>-1</sup>)</i> |
|-----------------------------------------|-------------------------------------------|---------------------------|-------------------------------------------------------------------------|
| UDP-Glc/ DAG (C16:0 /C18:1)             | 5.9±0.4                                   | 82.0±0.3                  | 71.9±2.7                                                                |
| UDP-Gal/ DAG (C16:0 /C18:1)             | 1.0±0.3                                   | 32.0±0.4                  | 31.3±2.9                                                                |
| UDP-GlcA/ DAG (C16:0 /C18:1)            | 4.1±0.1                                   | 68.0±0.5                  | 60.3±3.6                                                                |
| UDP-Glc/DAG (C18:0 /C20:4)              | 4.8±0.2                                   | 77.1±0.4                  | 62.2±0.9                                                                |
| UDP-Glc/DAG (C18:0 /C18:2)              | 6.2±1.5                                   | 102.5±0.8                 | 60.5±1.8                                                                |
| UDP-Glc/DAG (di18:1)                    | 5.0±0.8                                   | 90.5±1.6                  | 55.2±2.2                                                                |
| UDP-Glc/DAG (di18:0)                    | 3.6±0.7                                   | 75.3±1.2                  | 47.8±1.3                                                                |
| UDP-Glc/DAG (di16:0)                    | 1.7±1.4                                   | 55.2±0.9                  | 30.8±2.5                                                                |
| UDP-Glc/DAG (di14:0)                    | 1.0±2.2                                   | 45.9±1.1                  | 21.7±2.8                                                                |
| UDP-Glc/DAG (di12:0)                    | 0.5±0.4                                   | 21.6±0.8                  | 13.9±1.7                                                                |
| UDP-Glc/DAG (di10:0)                    | ND                                        | ND                        | ND                                                                      |
| UDP-Glc/DAG (di8:0)                     | ND                                        | ND                        | ND                                                                      |
| UDP-Glc/DAG (C16:0 /C18:1) <sup>b</sup> | 8.3±0.3                                   | 58.0±0.6                  | 143.1±3.9                                                               |

707 <sup>a</sup>The values are means of three independent experiments ± standard deviations. ND, not detectable.

708 <sup>b</sup>The kinetic parameters were determined using purified GT<sub>cp</sub> in the presence of Mg<sup>2+</sup> (5 mM).

709

710 **Table 3** Kinetic parameters of GT<sub>cp</sub> using UDP-Glc, UDP-Gal and UDP-GlcA as sugar donor and C16:0  
711 /C18:1 DAG as acceptor <sup>a</sup>.

| <i>Substrate</i>                      | <i>k<sub>cat</sub> (min<sup>-1</sup>)</i> | <i>K<sub>m</sub> (μM)</i> | <i>k<sub>cat</sub>/K<sub>m</sub> (min<sup>-1</sup> mM<sup>-1</sup>)</i> |
|---------------------------------------|-------------------------------------------|---------------------------|-------------------------------------------------------------------------|
| UDP-Glc                               | 5.85±0.4                                  | 82±0.3                    | 71.4±2.7                                                                |
| UDP-Gal                               | 1.03±0.3                                  | 32±0.4                    | 32.2±2.9                                                                |
| UDP-GlcA                              | 4.05±0.1                                  | 68±0.5                    | 59.6±3.6                                                                |
| UDP-Glc (with 5 mM Mg <sup>2+</sup> ) | 8.25±0.3                                  | 58±0.6                    | 142.2±3.9                                                               |

712 <sup>a</sup>The values are means of three independent experiments.



713

714 **Table 4** Kinetic parameters of GT<sub>cp</sub> in comparison with GT4 glycosyltransferases using different sugar

715 donor<sup>a</sup>.

| Parameter                           | GT <sub>cp</sub> | PimA    | PimB       | MshA          | TarM     | BshA       | GtfA        | PglH      |
|-------------------------------------|------------------|---------|------------|---------------|----------|------------|-------------|-----------|
| Donor substrate                     | UDP-Glc          | GDP-Man |            |               |          | UDP-GlcNAC |             |           |
| $K_m$ ( $\mu M$ )                   | 82 ± 0.3         | 18 ± 2  | 19.0 ± 4.6 | 0.208 ± 0.017 | 65 ± 10  | 180 ± 50   | 11.8 ± 1.5  | 2.6 ± 0.3 |
| $k_{cat}$ ( $min^{-1}$ )            | 5.8 ± 0.4        |         |            |               | 126 ± 10 | 78.6       | 7.35 ± 0.42 | 4.4 ± 0.2 |
| $k_{cat}/K_m$ ( $min^{-1}mM^{-1}$ ) | 71.4 ± 2.7       |         |            |               |          | 6.8        | 0.63        | 1.7 ± 0.2 |

716

717 a The values are means of three independent experiments. UDP-GlcNAC: UDP-N-acetylglucosamine;

718 GDP-Man: GDP-mannose

719

720 **Table 5** Primers used for PCR amplification in this study

| Vectors          | Upper primers <sup>a</sup>                                 | Lower primers <sup>b</sup>                      |
|------------------|------------------------------------------------------------|-------------------------------------------------|
| GT <sub>cp</sub> | 5'-GCCG <u>CATATG</u> AAAATTTTAATCGTAAC-3' ( <i>NcoI</i> ) | 5'-GGCGTCGACATTAGGTGATATTAAG-3' ( <i>Sall</i> ) |
| G16A             | 5'- CCACTTGTGAAT <u>GCT</u> GTAGTTCGAAC-3'                 | 5'-GTTCGAACTACAGCATTCAACAAGTGG-3'               |
| L56A             | 5'-GAAATTAGAGCATCATTAATGTTG-3'                             | 5'-CAAACATTTAATGAT <u>GCT</u> CTAATTTTC-3'      |
| G82A             | 5'- CATATTGCAACAGAGGCACCTCTTGG-3'                          | 5'- CCAAGAGGTGCCTCTGTTGCAATATG-3'               |
| G85A             | 5'-GGGACCTCTT <u>GCT</u> TTTATGGCAAG-3'                    | 5'-CTTGCCATAAAAGCAAGAGGTCCC-3'                  |
| H104A            | 5'- CAACAAGTTTT <u>GCT</u> TACAAGATTTG-3'                  | 5'- CAAATCTTGTA <u>GCA</u> AAAACCTTGTG-3'       |
| T162A            | 5'-GGTTACATGGGCTAGGGGAGGTAATC-3'                           | 5'-CCATGATTACCTCCCCTAGCCCATGTAAC-3'             |
| R163A            | 5'-GGTTACATGGACTAGCGGAGGTAATCATGG-3'                       | 5'-CACCATGATTACCTCCGCTAGTCCATGTAAC-3'           |
| R190A            | 5'- GGATATACGTCGGTGCAGTTGCAGTTG-3'                         | 5'- CAACTGCAACTGCACCGACGTATATCC-3'              |
| K195A            | 5'- GCAGTTGAAGCAAAATATAAGC-3'                              | 5'- GCTTTAATATTTGCTTCAACTGC-3'                  |
| D256A            | 5'- CCCTAGCAAAACGAATACTTTTGG-3'                            | 5'- CCAAAAAGTATGCGTTTTGCTAGGG-3'                |
| D256E            | 5'- CCCTAGCAAAACGAATACTTTTGG-3'                            | 5'- CCAAAAAGTATTCGTTTTGCTAGGG-3'                |
| T257A            | 5'-CCCTAGCAAAACCGATGCTTTTGGTATTG-3'                        | 5'-CAATACCAAAAAGCATCGTTTTGCTAGGG-3'             |
| T257S            | 5'-CCCTAGCAAAACCGATAGTTTTGGTATTG-3'                        | 5'-CAATACCAAAAAGTATCGTTTTGCTAGGG-3'             |
| F258A            | 5'-CCGATACTGCTGGTATTGTGGTTTTGG-3'                          | 5'- CCAAAAACCACAATACCAGCAGTATCGG-3'             |
| G259A            | 5'-CCGATACTTTTGTATTGTGGTTTTGGAG-3'                         | 5'- CTCCAAAACCACAATAGCAAAAAGTATCGG-3'           |
| E264A            | 5'-GTGGTTTTGGAGTCTTTAAGTTGTGG-3'                           | 5'- CCACAACCTAAAGACTCCAAAACCAC-3'               |
| W320A            | 5'-GCTAAAAAATATAGTTCGGAAGAAAC-3'                           | 5'-CCTTGCTGTTTCTTCCGAAGTATTTTTAG-3'             |

721 <sup>a, b</sup> The sites of mutations are underlined.

722

723 **Figure legends**

724 **Figure 1** Multiple sequence alignment and functional domain analyses of GT<sub>cp</sub> protein. (A) A  
725 phylogenetic tree of GT<sub>cp</sub> and its homologs with known 3-dimensional X-ray structure of GTs.  
726 Sequences and structures of GTs are obtained from the NCBI database and the PDB database,  
727 including GT1 (calG3, SnogD, CalG1, SpnG, UrdGT2, OleD, CalG2, CalG4, GtfD, GtfA, Vinc,  
728 UGT78G1, UGT78K6, UGT85H2, UGT71G1 and UGT72B1), GT3 (CeGs), GT5 (Gbs1 and  
729 SSI), GT9 (WaaC, WaaF and Vpar 0760), GT28 (MurG), GT30 (WaaA and KdtA), GT35  
730 (AtPHS2, MalP and GlgP), GT68 (POFUT2), GT80 (Pdst and Bst), GT4 (PimA, PimB, WsaF,  
731 GtfA, TarM, PglH, MshA, BshA and WaaG), GT<sub>cp</sub> and its homologs (GT<sub>la</sub>, GT<sub>tl</sub>, GT<sub>mn</sub>, GT<sub>dm</sub>,  
732 GT<sub>cb</sub>, GT<sub>kg</sub>, GT<sub>al</sub>, GT<sub>bb</sub>, GT<sub>dr</sub>, GT<sub>pa</sub>, and Agt). GT<sub>pa</sub> is the GT4 glycosyltransferase of  
733 *Pseudomonas* sp. PA14 (Supplementary Figure S1). (B) Multiple sequence alignment for GT<sub>cp</sub>  
734 and its homologs using Clustal W program with manual adjusting: GT<sub>cp</sub> from *Candidatus*  
735 *Pelagibacter* sp. HTCC7211 (WP\_008545403.1); GT<sub>la</sub> from *Labrenzia*  
736 *aggregata* (WP\_040439323.1); GT<sub>tl</sub> from *Thalassospira lucentensis* (WP\_062950653.1); GT<sub>mn</sub>  
737 from *Methylophaga nitratireducenticrescens* (WP\_014706011.1); GT<sub>dm</sub> from *Desulfobulbus*  
738 *mediterraneus* (WP\_028584068.1); GT<sub>cb</sub> from *Citromicrobium bathyomarimum* JL354  
739 (WP\_010239457.1); GT<sub>kg</sub> from *Kordiimonas gwangyangensis* (WP\_051078133.1); the  
740 characterized Agt from *A. tumefaciens* (atu2297) and MshA from *C. glutamicum*  
741 (WP\_143854623.1). Red bars represent  $\alpha$ -helical regions and blue arrows represent  $\beta$ -sheet  
742 from MshA (Protein Data Bank [PDB] entry 3C4Q). Residues interacting with UDP-sugar are  
743 indicated by the closed black circles. Catalytic dyad composed of His104-Asp256 is shaded  
744 in grey. Black boxed regions and red boxed regions in the alignment indicated two conserved  
745 UDP-sugar binding motifs of GRVAXEKN and FPSXTDTFG and a conserved Gly-rich motif,  
746 respectively. (C) Homology modelling showing the predicted structure of GT<sub>cp</sub> and the catalytic  
747 dyad composed of His104-Asp256. The signature glutamate residue in MshA (Glu316) is  
748 substituted to an aspartate residue (Asp256) in GT<sub>cp</sub>.

749

750 **Figure 2** (A) Over-expression and purification of GT<sub>cp</sub> proteins from *Candidatus Pelagibacter*

751 sp. HTCC7211. M, protein molecular weight marker. Lane 1 cell-free supernatant induced with  
752 Isopropyl  $\beta$ -D-1-thiogalactopyranoside (IPTG), lane 2 cell-free supernatant without IPTG  
753 induction and lanes 3-4, purified GT<sub>cp</sub> (molecular weight estimated to be ~ 38 kDa). (B) Gel  
754 filtration analysis of the wild-type GT<sub>cp</sub> and the mutant L56A. The red arrows indicate the eluted  
755 position of GT<sub>cp</sub> and the L56A mutant, the black arrows indicate protein markers (from left to  
756 right): alcohol dehydrogenase (150 kDa, 12.35 ml), albumin (66 kDa, 15.83 ml) and carbonic  
757 anhydrase (29 kDa, 17.95 ml).

758

759 **Figure 3** Functional characterization of recombinant GT<sub>cp</sub>. (A) TLC of the enzymatic reaction  
760 products with different UDP-sugar donors and diacylglycerol (DAG) as the acceptor by staining  
761 with sulfuric acid/methanol/water (45:45:10). (B-D) LC-MS of fragmentation spectra for  
762 monohexuronosyl DAGs (MGlc-DAG and MGal-DAG) and MGlcA-DAG were obtained from  
763 the products of the GT<sub>cp</sub>-catalysed reaction.

764

765 **Figure 4** Biochemical characterization of GT<sub>cp</sub>. (A) Effect of temperature on the activities of  
766 GT<sub>cp</sub>. (B) Arrhenius plot of GT<sub>cp</sub>. The activation energy of the reaction  $E_a = 25.1 \text{ kJ mol}^{-1}$  could  
767 be determined from the slope of the regression curve. (C) Thermostability of GT<sub>cp</sub>. The residual  
768 enzyme activity was measured after incubation of the purified enzyme at 30°C (diamonds),  
769 40°C (triangles), and 50°C (boxes), respectively. (D) Effect of pH on the activities of GT<sub>cp</sub>. (E)  
770 Effect of NaCl on the activities of GT<sub>cp</sub>. The enzyme was incubated in buffers containing  
771 different concentrations of NaCl (0 to 4 M) at 4°C for 1 h. Residual activity was measured  
772 under optimal conditions. (F) Effect of metal ions (5 mM) on the activities of GT<sub>cp</sub>. The values  
773 are means of three independent experiments.

774

775 **Figure 5** Homology modelling prediction of the UDP-sugar donor binding pocket in the GT<sub>cp</sub>.  
776 (A) UDP-sugar binding site of MshA (22) and predicted UDP-sugar binding site of GT<sub>cp</sub>. (B)  
777 Mutational analysis of the key amino acids involved in the catalytic glycosylation reactions of  
778 GT<sub>cp</sub>. (C) Overlay of <sup>1</sup>H, heteronuclear single-quantum correlation (HSQC) and heteronuclear

779 multiple bond correlation (HMBC) spectra of MGlc-DAG.

780

781 **Figure 6** Identification of key residues for diacylglycerol (DAG) binding in the GT<sub>cp</sub>. **A)**

782 Homology modelling prediction of the open model based on template 2R60. The arrow

783 indicates the wide cleft. **B)** C16:1/C18:0-DAG (green) docked in GT<sub>cp</sub> in the groove (shown as

784 a transparent surface). **C)** A detailed depiction of key coordinating hydrophobic (black) and

785 polar (light blue) residues for DAG. His104, Thr162, Arg163, Trp320 are crucial for enzyme

786 activity (Fig. 5B). **D)** An overlay of UDP-glucose (Blue), UDP-galactose (Cyan) and UDP-

787 glucuronic acid (Green) showing all three ligands can occupy the same binding site in similar

788 poses in the DAG-docked GT<sub>cp</sub>. **E)** A top-down view of DAG and UDP-galactose shown docked

789 parallel to each other in their respective binding pockets/grooves.

790

791

792 **Figure 7** Proposed pathway of the synthesis of non-phosphorus glycoacylglycerolipids through

793 PlcP and GT<sub>cp</sub> in *Candidatus Pelagibacter* sp. HTCC7211. PlcP converts phosphatidylglycerol

794 (PG) or phosphatidylethanolamine (PE) to generate diacylglycerol (DAG), and GT<sub>cp</sub> can

795 synthesize different glycoacylglycerolipids MGlc-DAG, MGal-DAG and MGlcA-DAG with UDP-Glc,

796 UDP-Gal, or UDP-GlcA as sugar donors and DAG as the acceptor.



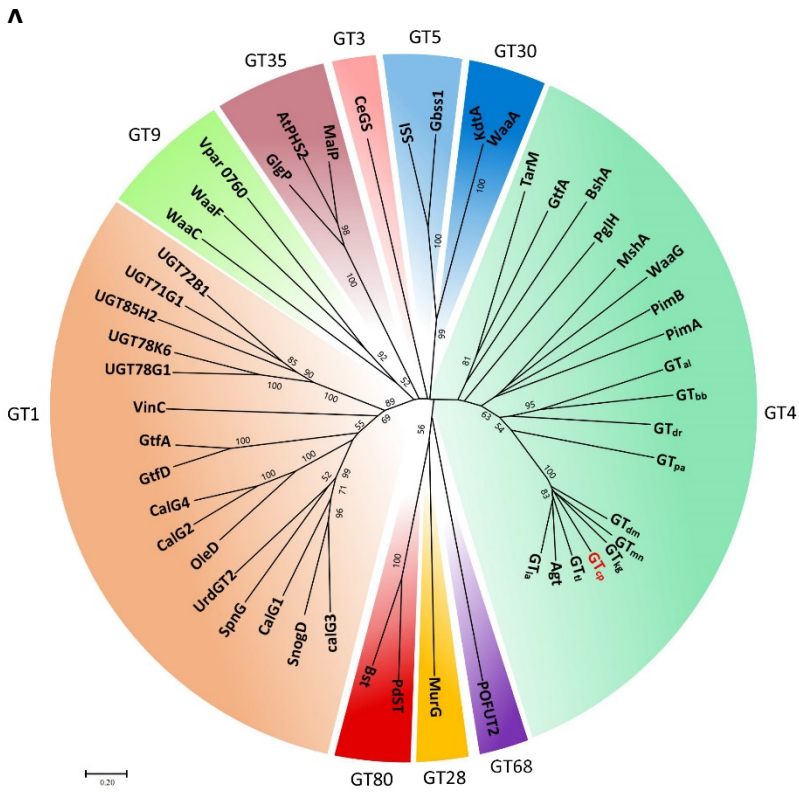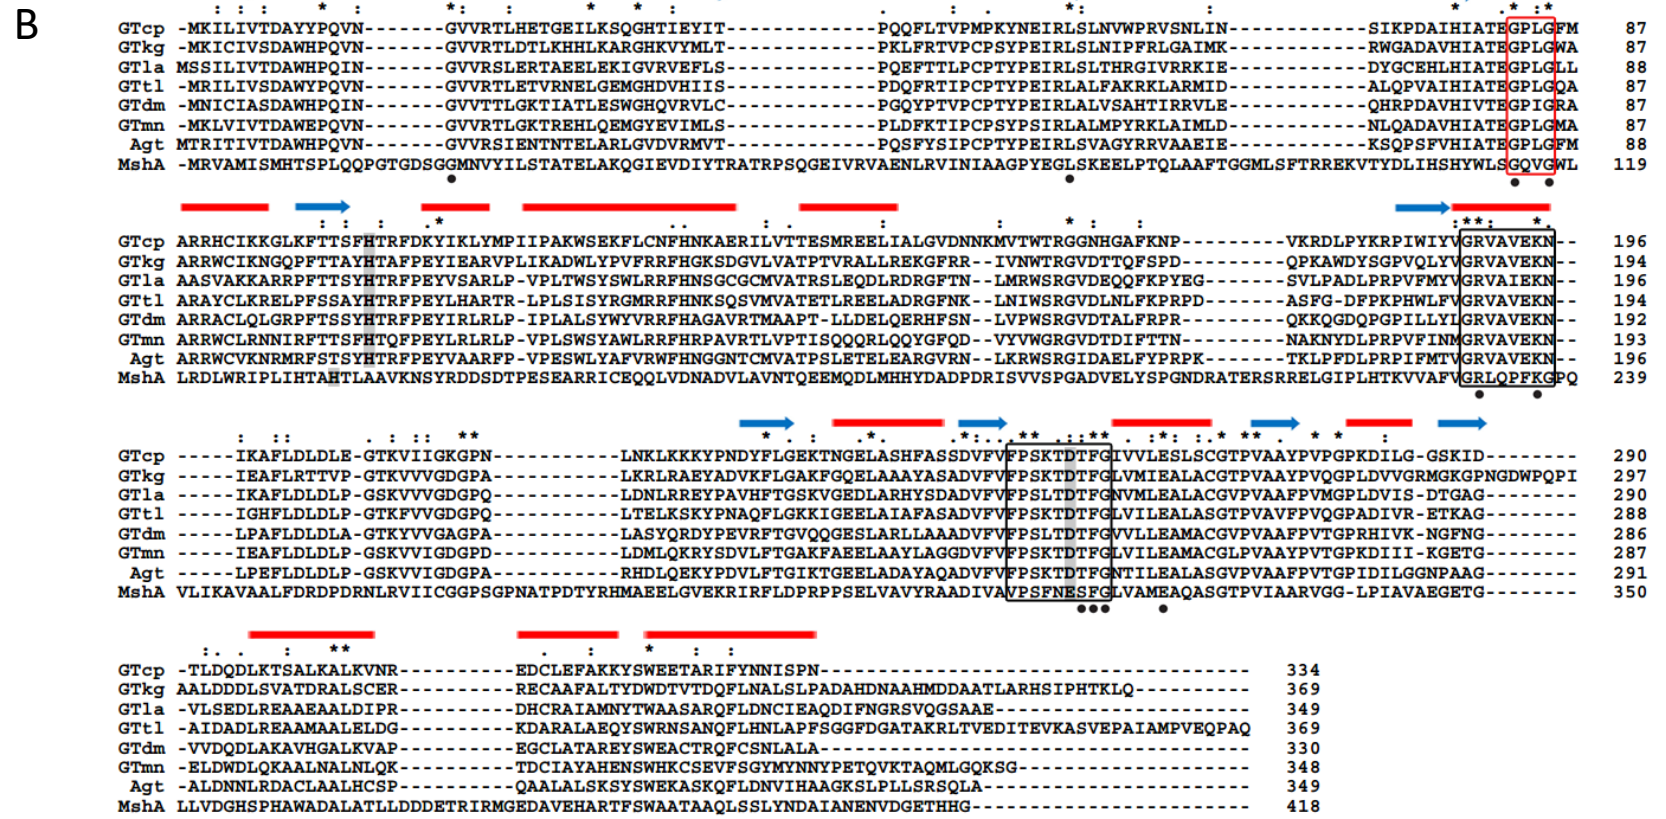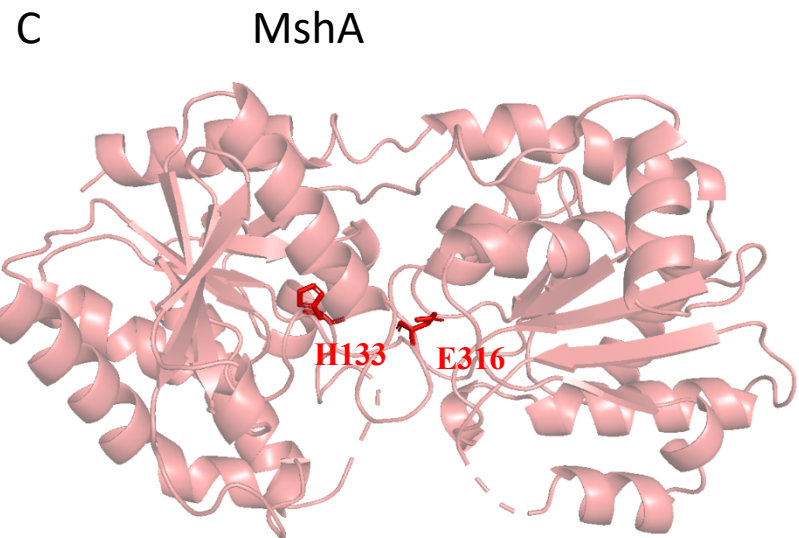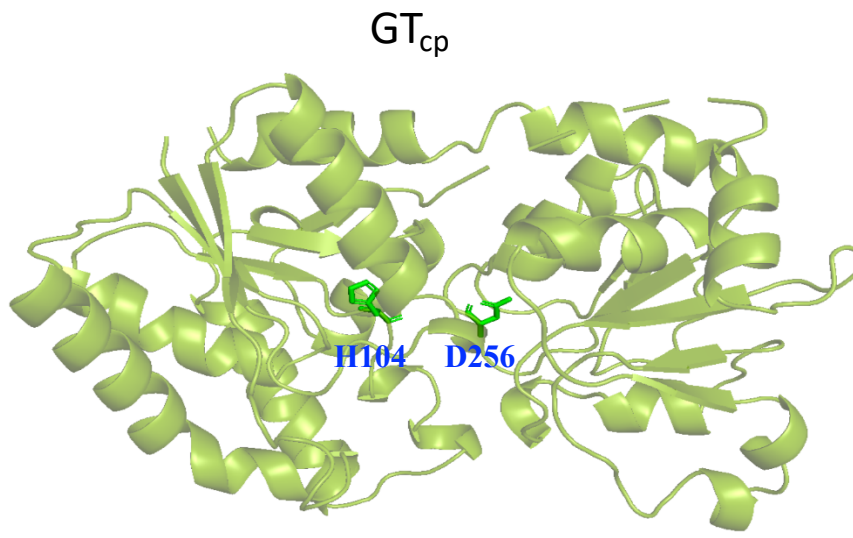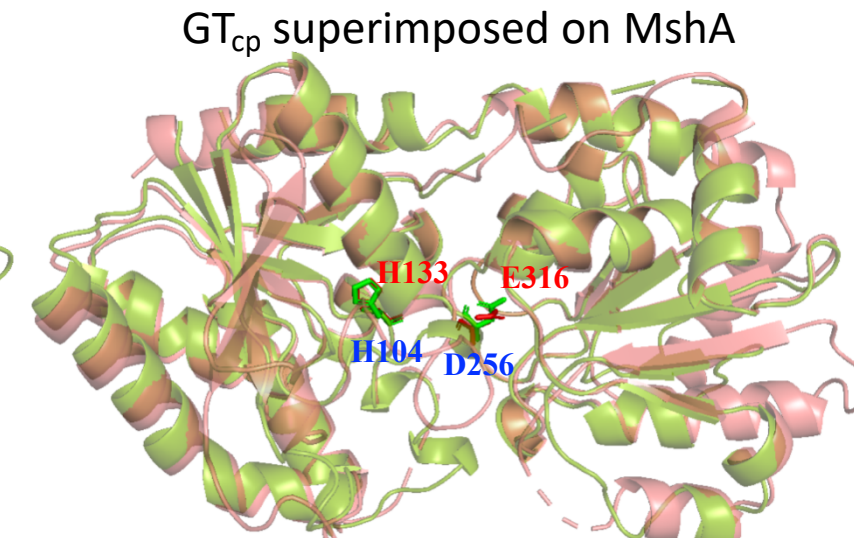

A

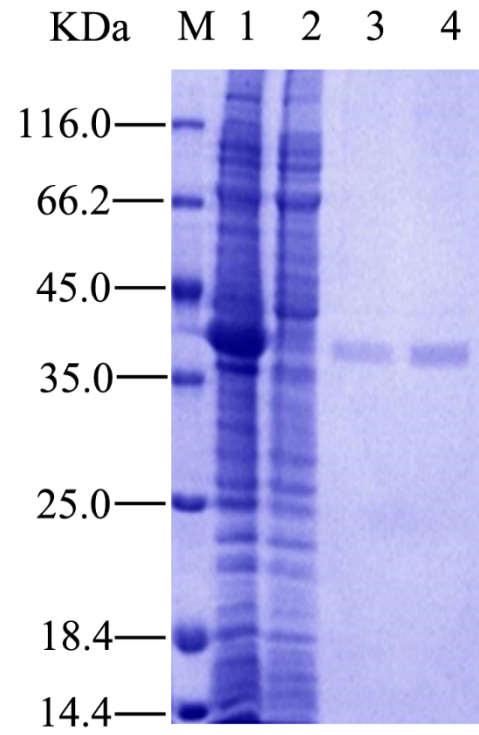

B

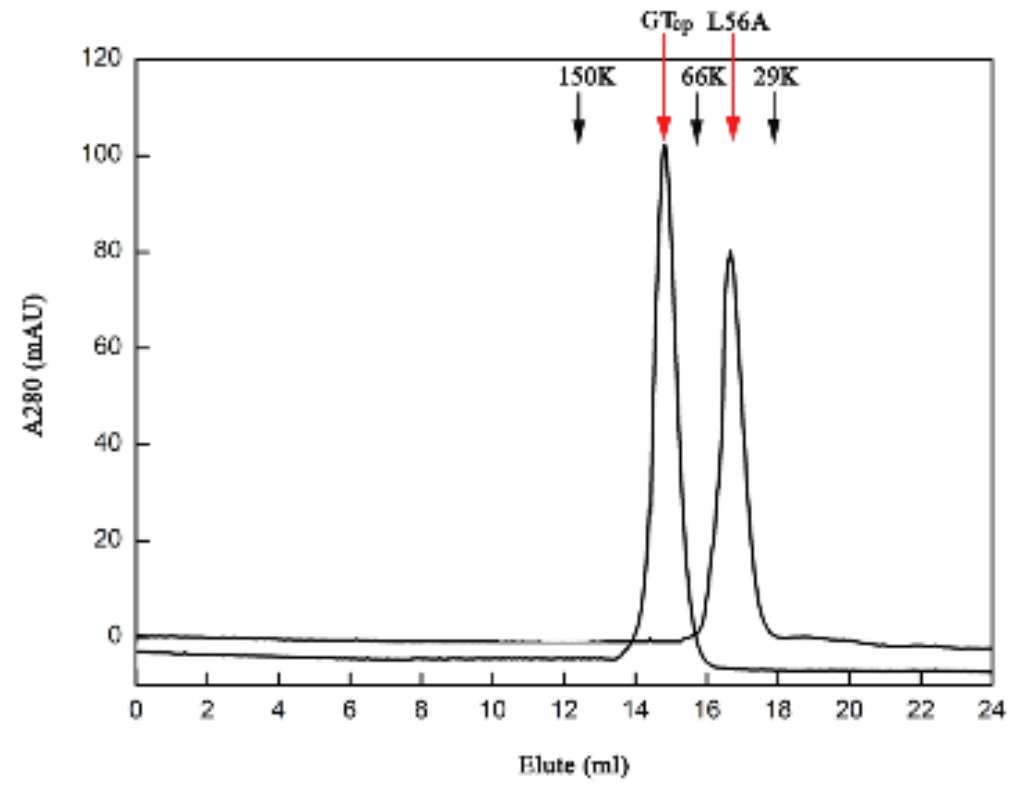

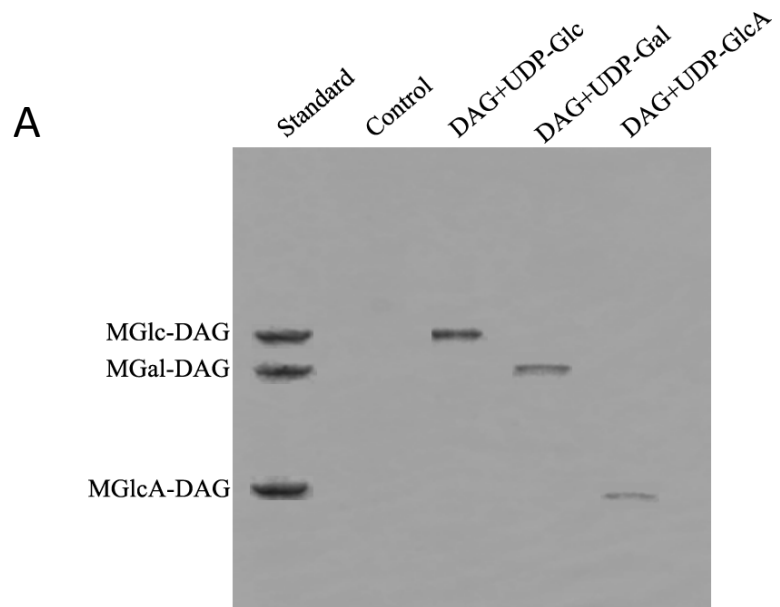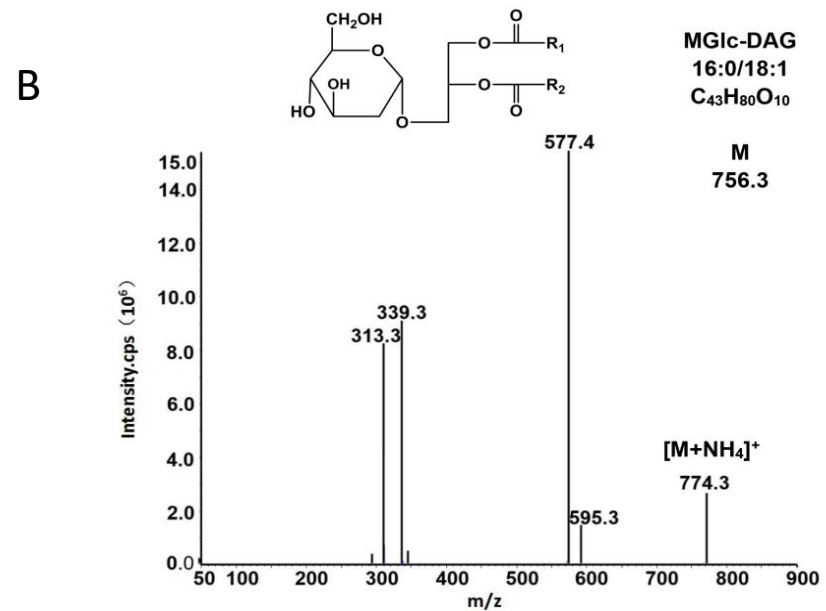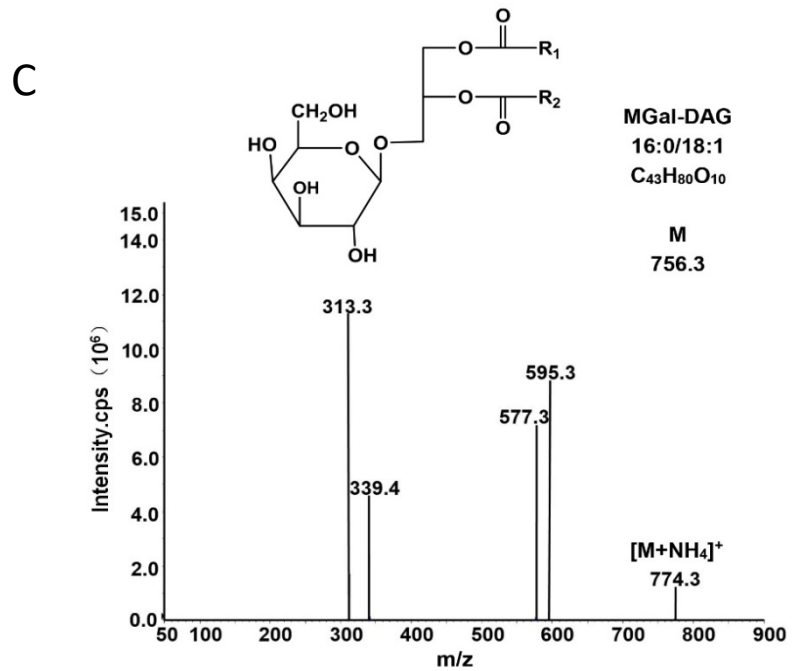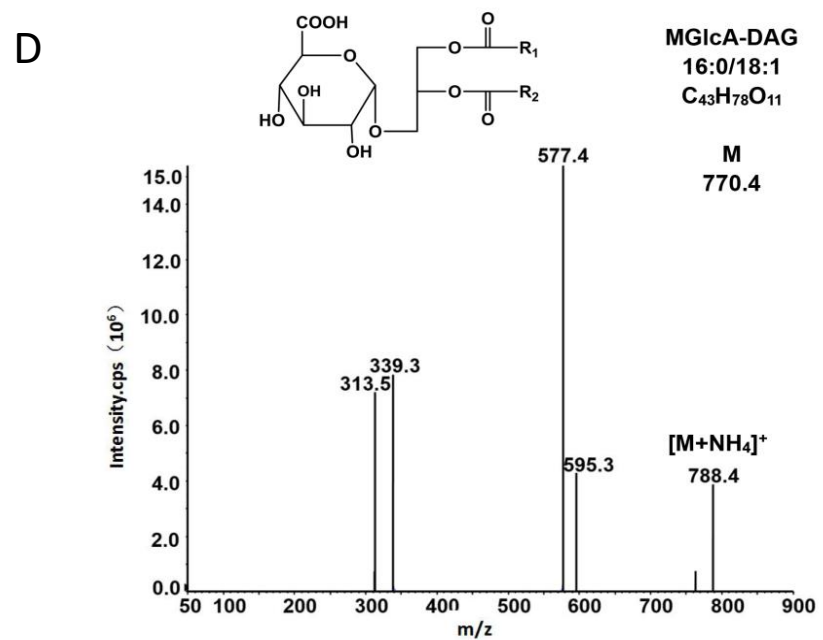

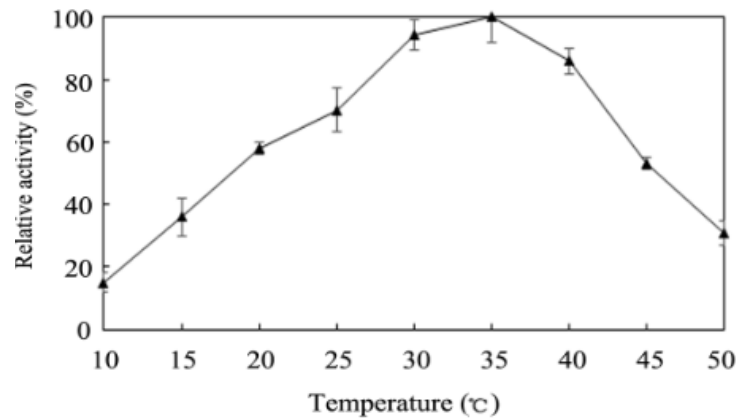

A

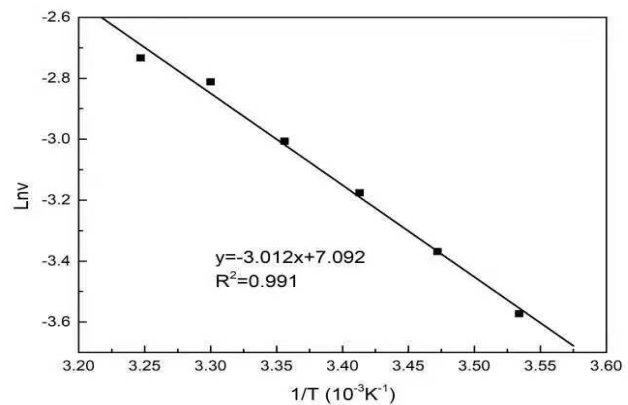

B

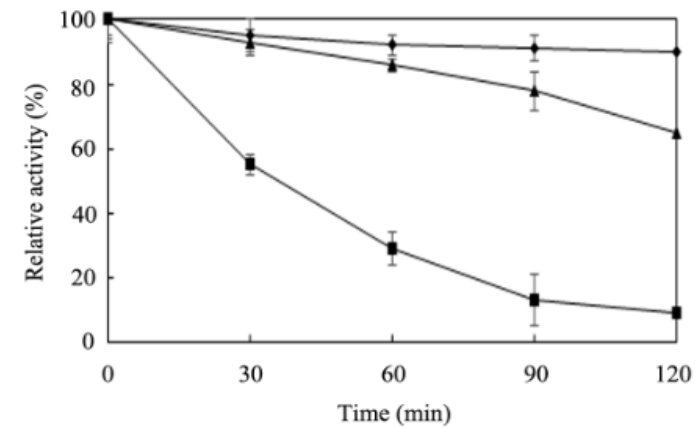

C

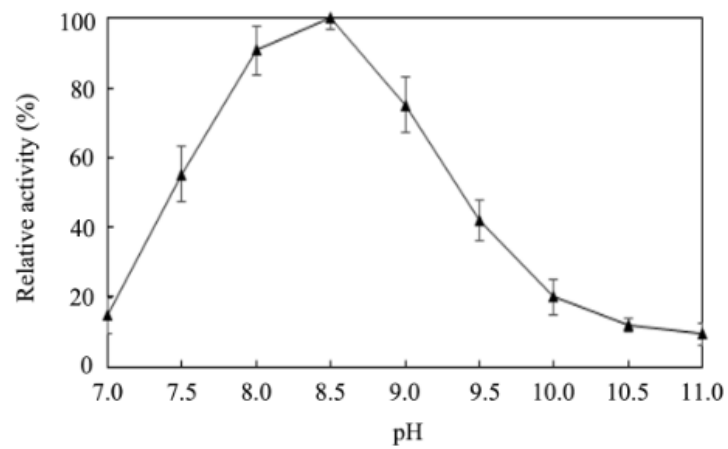

D

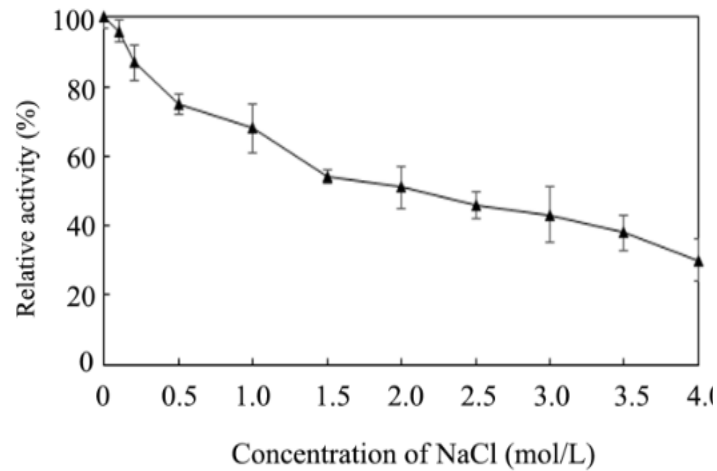

E

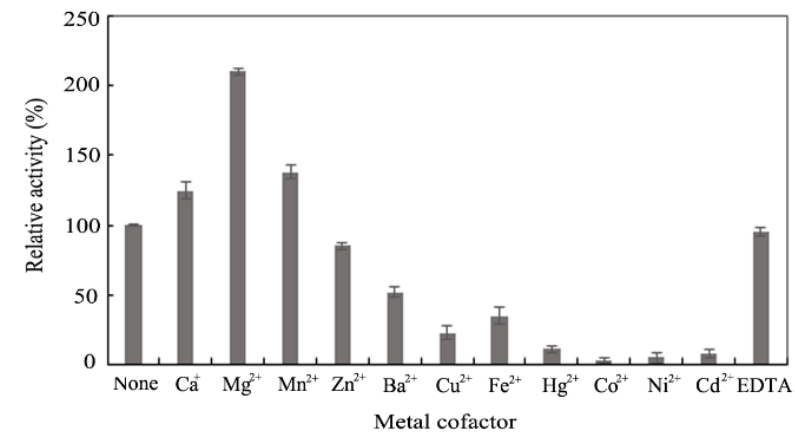

F



A

MshA

GT<sub>cp</sub>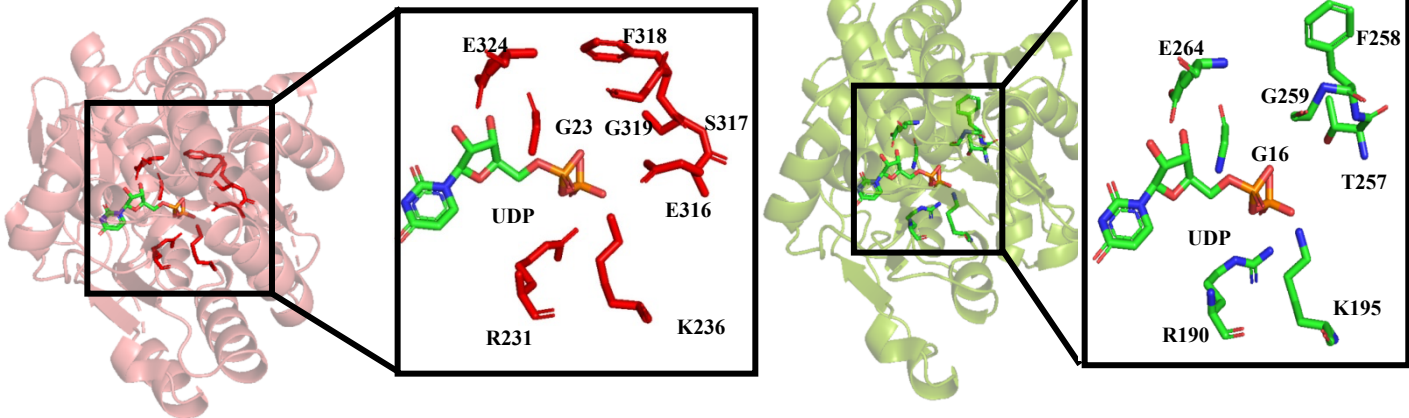

B

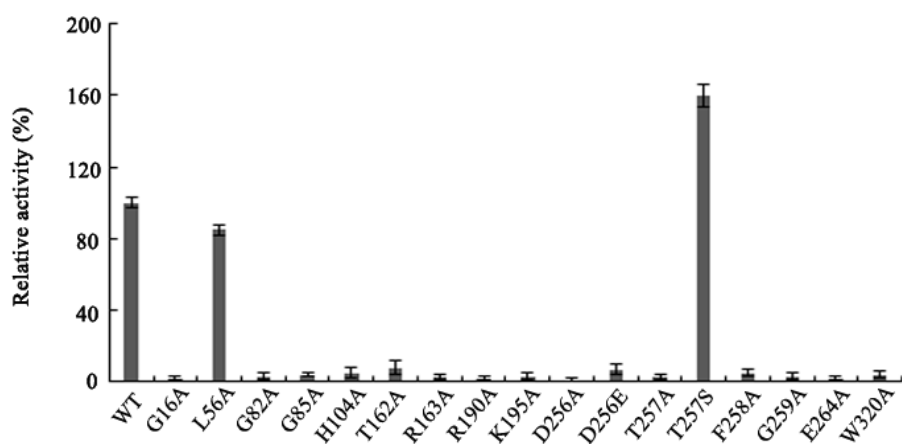

C

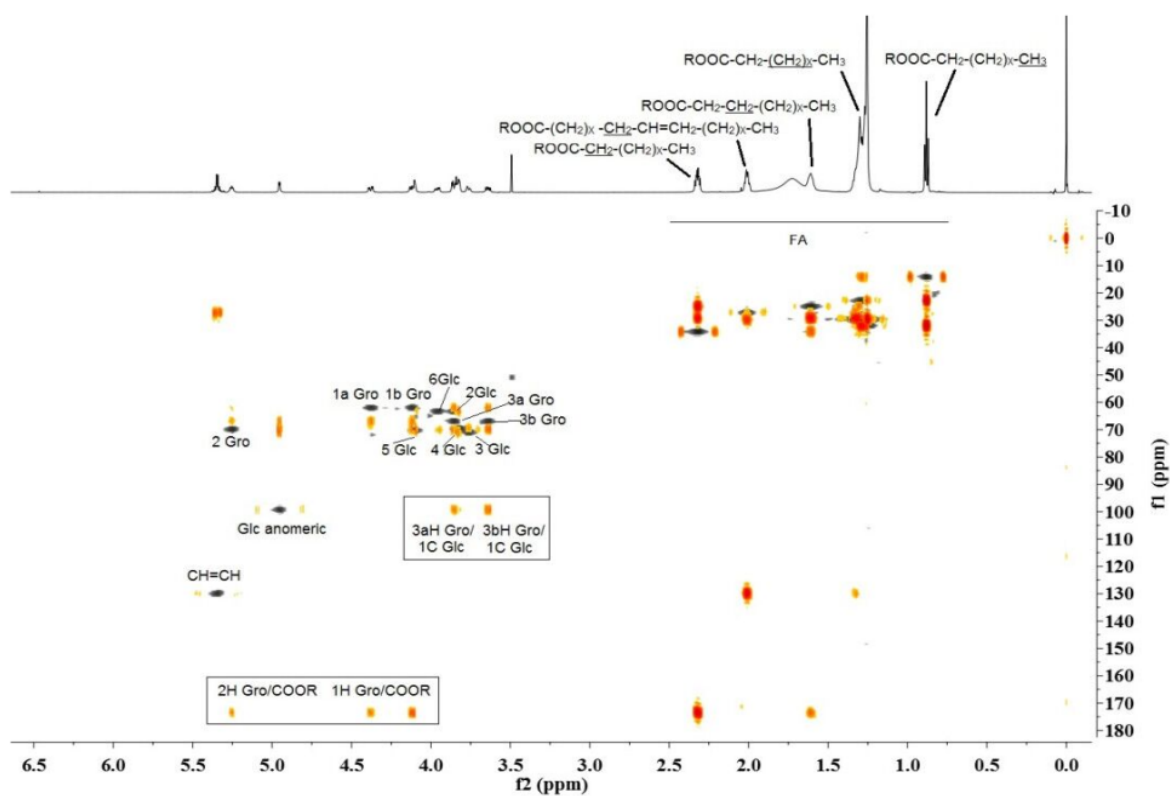

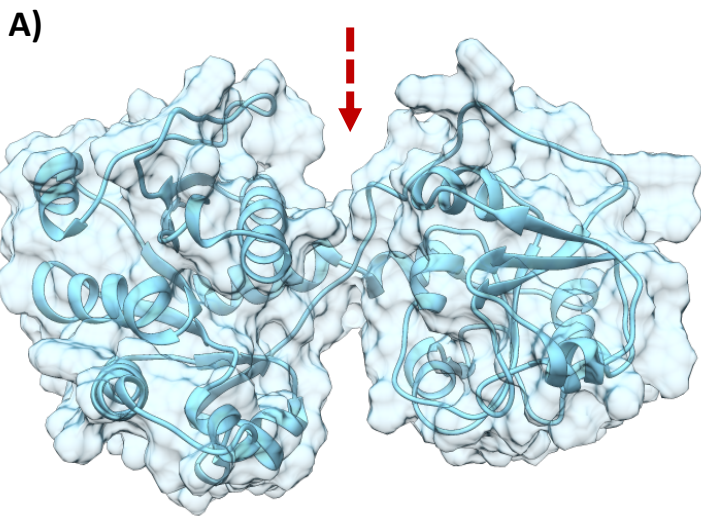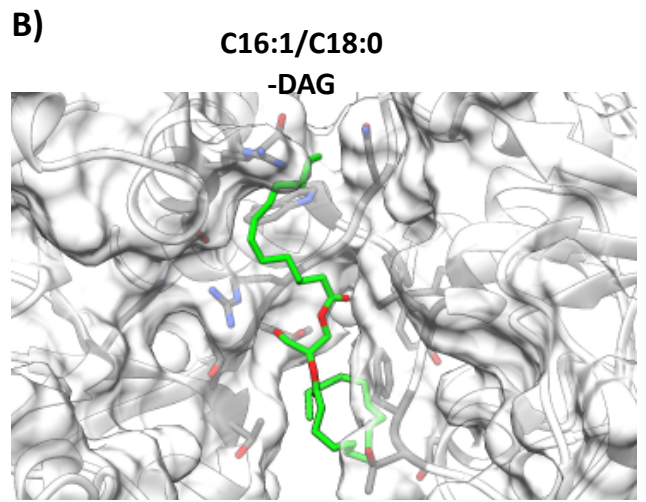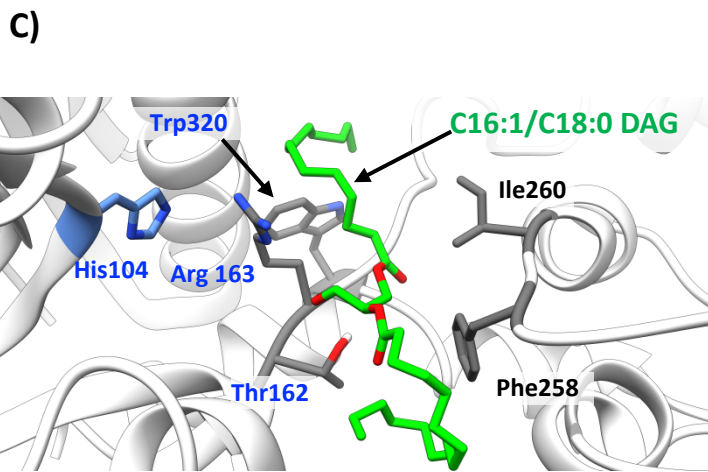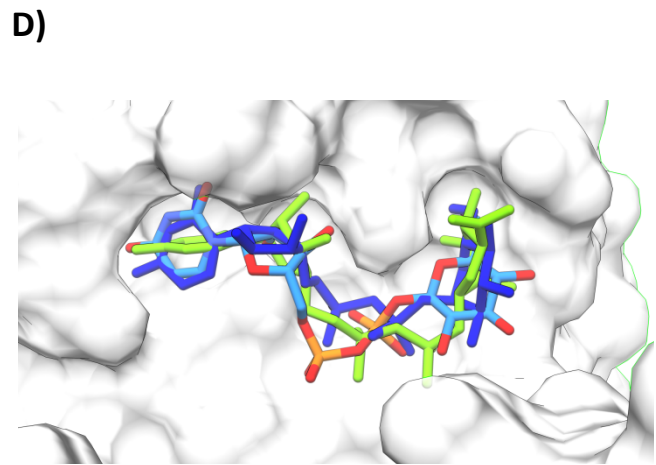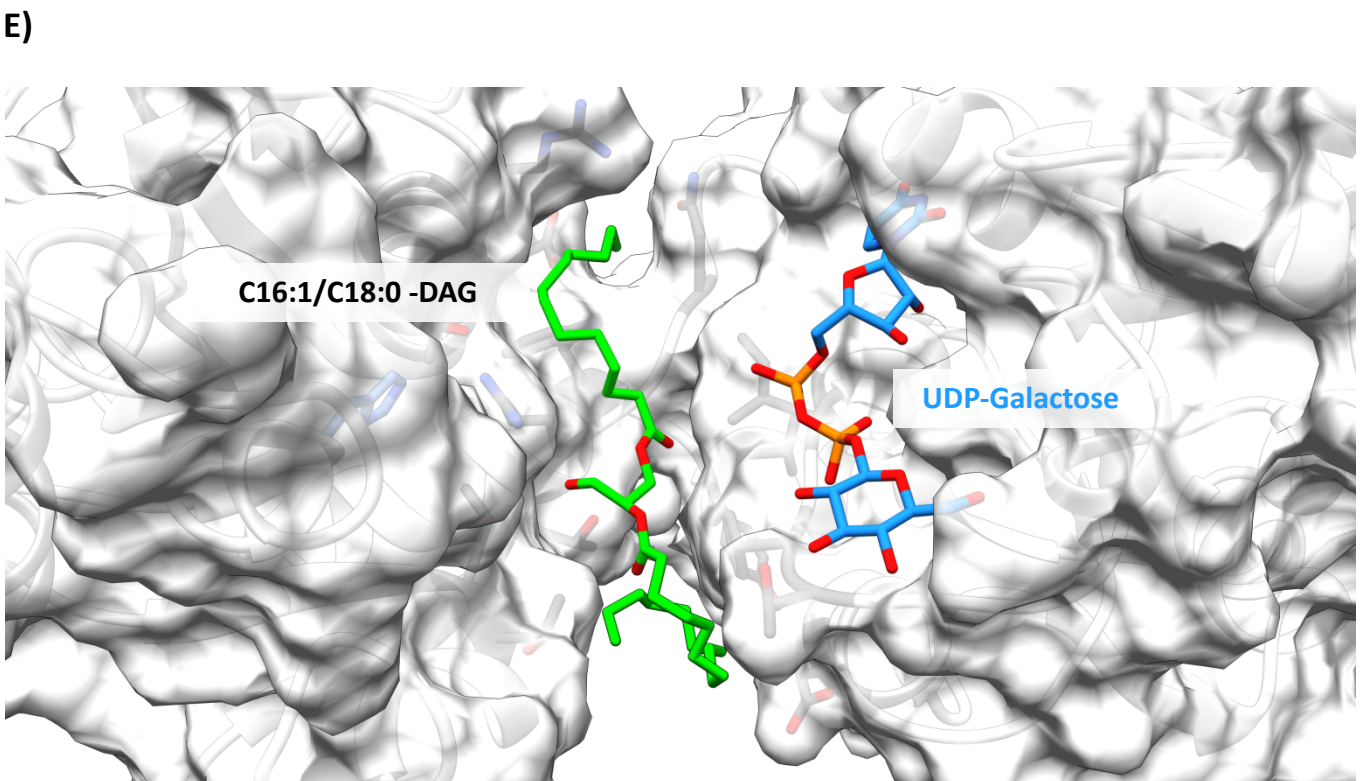

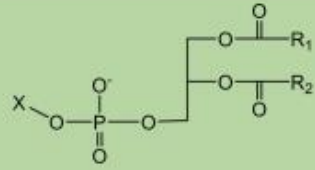

Phospholipid (PE or PG)

**PlcP**

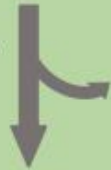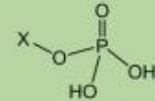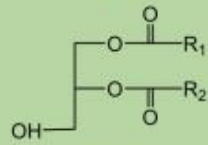

DAG

**GT<sub>cp</sub>**

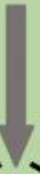

UDP-Gal

UDP-Glc

UDP-GlcA

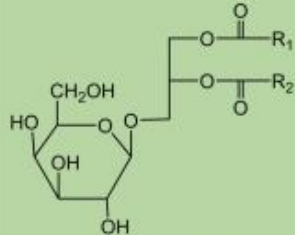

MGal-DAG

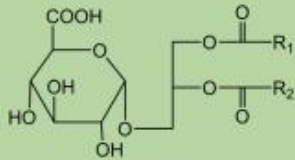

MGlcA-DAG

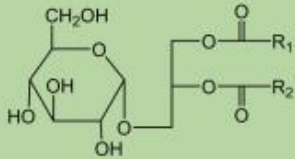

MGlc-DAG
